# Supplementary material
Source: PubMed Central journal article supplement (PMC9007901)

# Identification of Histone Deacetylase 10 (HDAC10)

## Inhibitors that Modulate Autophagy in

## Transformed Cells

Patrik Zeyen<sup>1,#</sup>, Yanira Zeyn<sup>2,#</sup>, Daniel Herp<sup>3</sup>, Fereshteh Mahmoudi<sup>1</sup>, Talha Z. Yesiloglu<sup>1</sup>, Frank Erdmann<sup>1</sup>, Matthias Schmidt<sup>1</sup>, Dina Robaa<sup>1</sup>, Christophe Romier<sup>4</sup>, Johannes Ridinger<sup>5,6</sup>, Corey J. Herbst-Gervasoni<sup>7</sup>, David W. Christianson<sup>7</sup>, Ina Oehme<sup>5,6</sup>, Manfred Jung<sup>3</sup>, Oliver H. Krämer<sup>2,\*,#</sup> and Wolfgang Sippl<sup>1,\*,#</sup>

<sup>1</sup> Institute of Pharmacy, Martin-Luther University of Halle-Wittenberg, Wolfgang-Langenbeck-Str. 2-4, 06120 Halle/Saale, Germany

<sup>2</sup> Institute of Toxicology, Johannes-Gutenberg University of Mainz, Obere Zahlbacher Str. 67, 55131 Mainz, Germany

<sup>3</sup> Institute of Pharmaceutical Sciences, Albert-Ludwigs University of Freiburg, Albertstraße 25, 79104 Freiburg, Germany

<sup>4</sup> Université de Strasbourg, CNRS, INSERM, Institut de Génétique et de Biologie Moléculaire et Cellulaire (IGBMC), Département de Biologie Structurale Intégrative, 67404 Illkirch Cedex, France

<sup>5</sup> Hopp Children's Cancer Center Heidelberg (KiTZ), 69120 Heidelberg, Germany

<sup>6</sup> Clinical Cooperation Unit Pediatric Oncology, German Cancer Research Center (DKFZ) and German Cancer Consortium (DKTK), 69120 Heidelberg, Germany

<sup>7</sup> Roy and Diana Vagelos Laboratories Department of Chemistry University of Pennsylvania Philadelphia, PA 19104-6323, USA

# contributed equally to the work

\* equal last author contributions

‡ correspondence to okraemer@uni-mainz.de and wolfgang.sipl@pharmazie.uni-halle.de

## Content

|                                                     |             |
|-----------------------------------------------------|-------------|
| <b>S1. Molecular modelling results</b>              | <b>3-5</b>  |
| <b>S2. LysoTracker results</b>                      | <b>6</b>    |
| <b>S3. NMR, HPLC and HRMS characterization data</b> | <b>7-29</b> |

## S1: Molecular modelling results

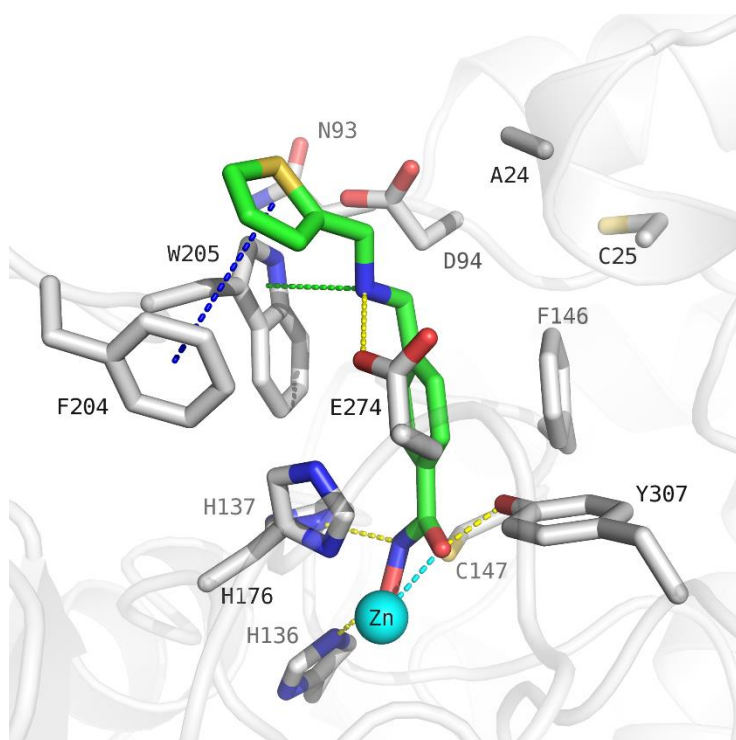

**Figure S1:** Obtained docking pose of benzhydroxamic acid derivatives carrying a methylene spacer. Predicted binding mode of **4b** in the catalytic pocket of drHDAC10 (PDB ID: 5TD7). The Zn ion is shown as cyan sphere and water molecules as red spheres. Yellow dashed lines depict hydrogen bond and salt-bridge interactions, cyan dashed lines metal chelation, green dashed lines cation- $\pi$  interactions and blue-dashed lines  $\pi$ - $\pi$  interactions.

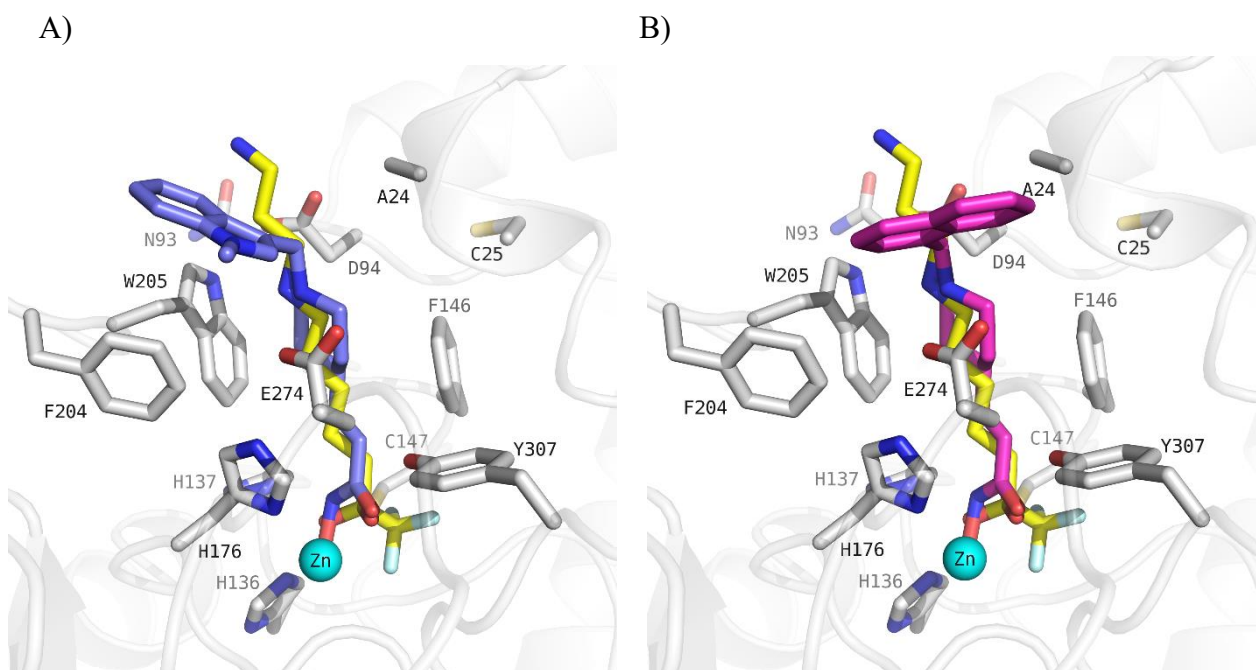

**Figure S2: Superimposition of docking solutions of 10c and 13b with the cocrystal structure of drHDAC10 in complex with *N*8-acetylspermidine analogue (PDB ID 5TD7).** a) Predicted binding mode of **13b** (state blue sticks) overlapped with the experimentally determined binding mode of *N*8-acetylspermidine analogue (yellow sticks) taken from the respective crystal structure (PDB ID 5TD7), c) Predicted binding mode of **10c** (pink sticks) overlapped with the experimentally determined binding mode of *N*8-acetylspermidine analogue (yellow sticks) taken from the respective crystal structure (PDB ID 5TD7). Binding site residues are shown as white sticks and the catalytic zinc ion as cyan sphere.

A)

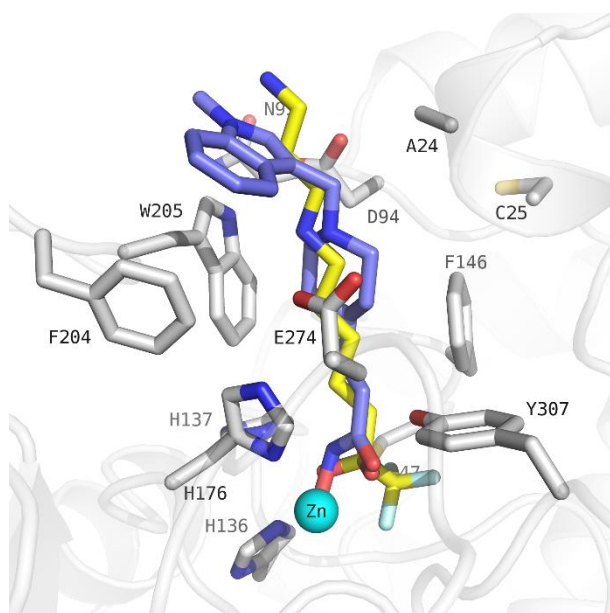

B)

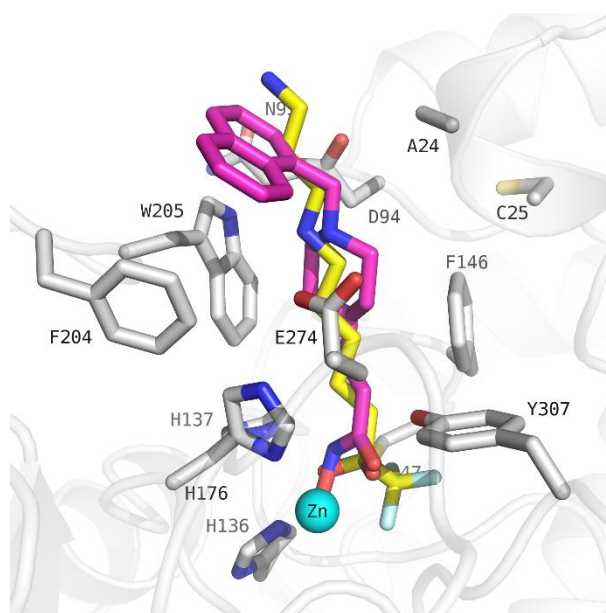

**Figure S3:** a) Predicted binding mode of **13b** (state blue sticks) and **10c** (pink sticks) in humanized drHDAC10 (PDB ID 6VNQ). b) Predicted binding mode of **13b** (state blue sticks) overlapped with the experimentally determined binding mode of *N8*-acetylspermidine analogue (green sticks) taken from the respective crystal structure (PDB ID 5TD7), b) Predicted binding mode of **10c** (pink sticks) overlapped with the experimentally determined binding mode of *N8*-acetylspermidine analogue inhibitor (green sticks) taken from the respective crystal structure (PDB ID 5TD7). Binding site residues are shown as white sticks and the catalytic zinc ion as cyan sphere.

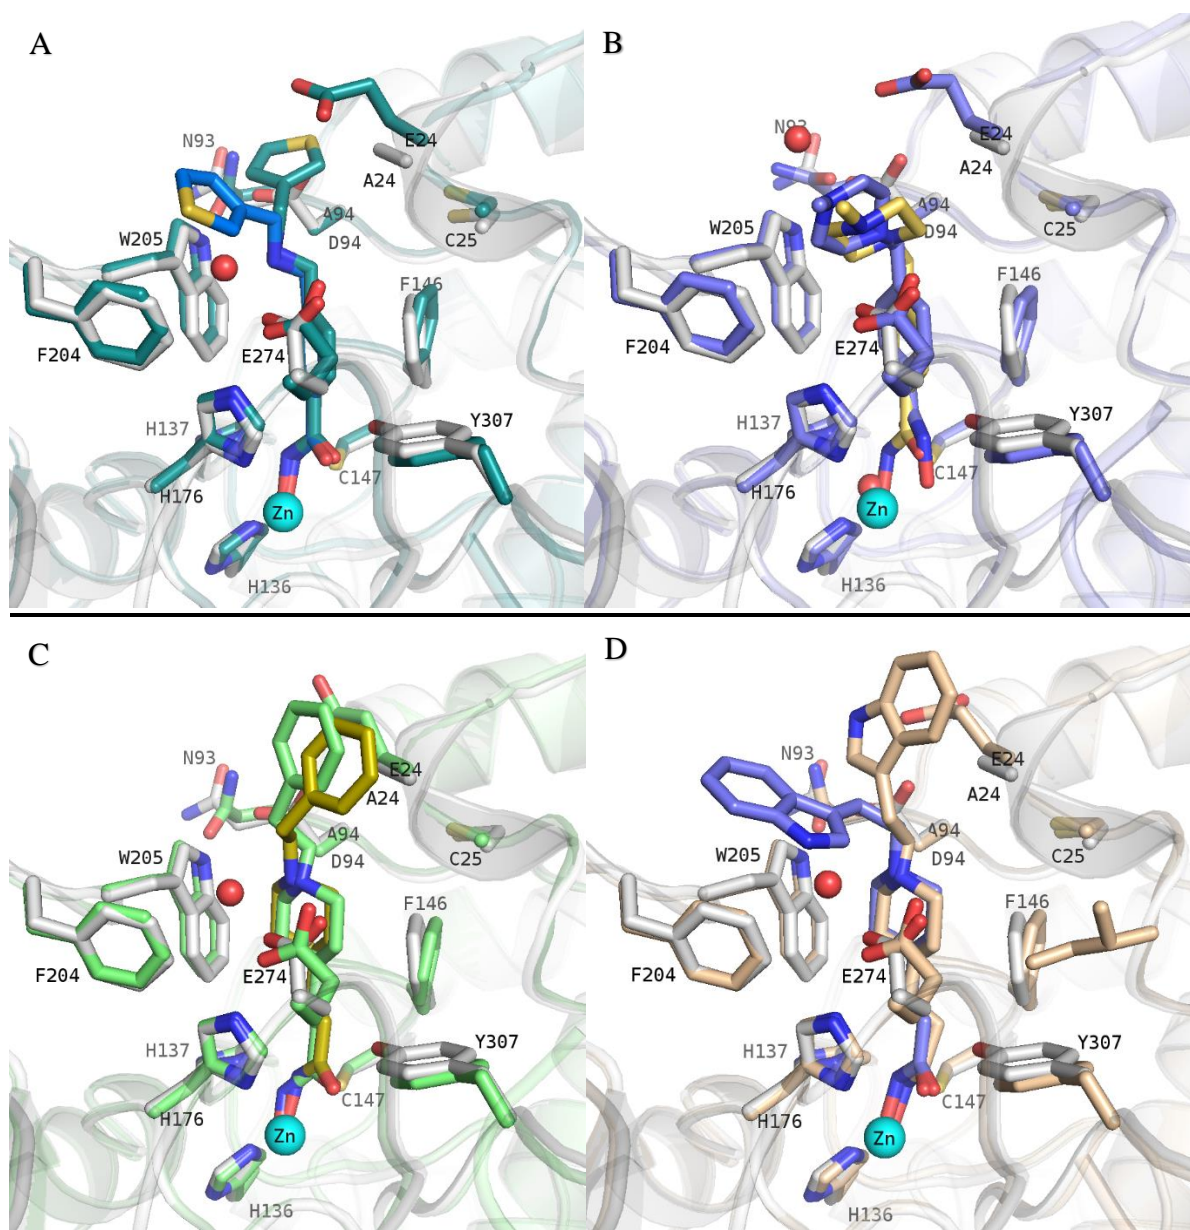

**Figure S4:** a) Predicted binding mode of **4c** in drHDAC10 (PDB ID 5TD7) (state blue sticks) overlapped with the experimentally determined binding mode of **4c** (oil green sticks) in humanized drHDAC10. b) Predicted binding mode of **6b** in drHDAC10 (PDB ID 5TD7) (yellow sticks) overlapped with the experimentally determined binding mode of **6b** (magenta sticks) in humanized drHDAC10. c) Predicted binding mode of **10a** in drHDAC10 (PDB ID 5TD7) (golden sticks) overlapped with the experimentally determined binding mode of **10a** (pale green sticks) in humanized drHDAC10. d) Predicted binding mode of **10b** in drHDAC10 (PDB ID 5TD7) (magenta sticks) overlapped with the experimentally determined binding mode of



**10b** (wheat sticks) in humanized drHDAC10. Binding site residues of in drHDAC10 (PDB ID 5TD7) are shown as white sticks, binding site residues of new crystals with the same colour of their own ligands respectively, water residues in the new crystals as red sphere and the catalytic zinc ion as cyan sphere.

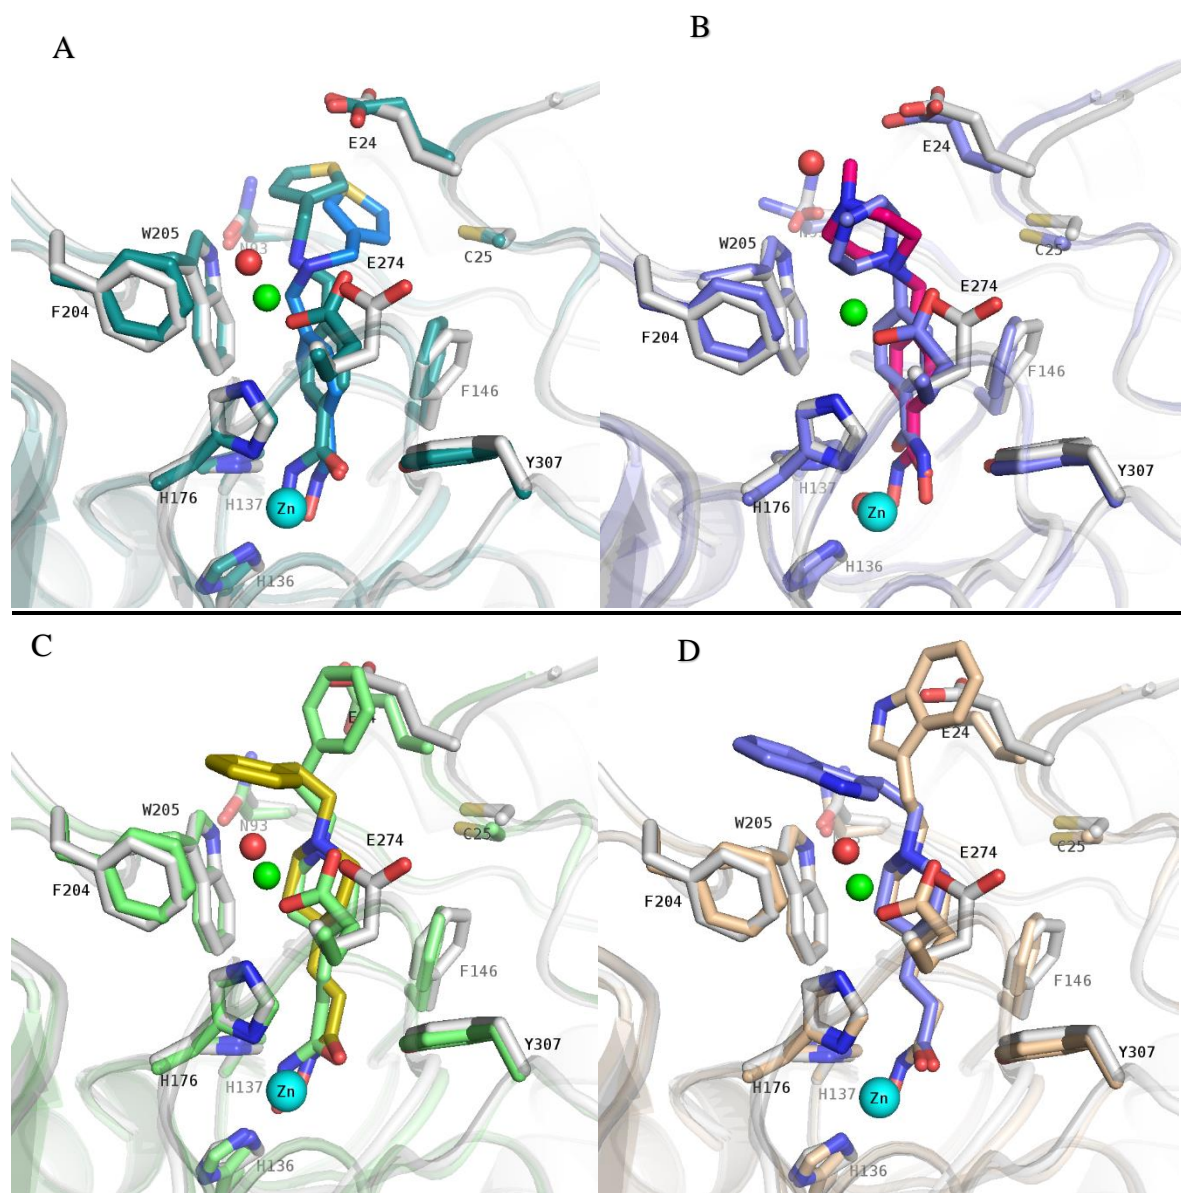

**Figure S5** a) Predicted binding mode of **4c** in humanized drHDAC10 (PDB ID 6VNQ) (state blue sticks) overlapped with the experimentally determined binding mode of **4c** (oil green sticks) in humanized drHDAC10. b) Predicted binding mode of **6b** in humanized drHDAC10 (PDB ID 6VNQ) (pink sticks) overlapped with the experimentally determined binding mode of **6b** (magenta sticks) in humanized drHDAC10. c) Predicted binding mode of **10a** in humanized



drHDAC10 (PDB ID 6VNQ) (golden sticks) overlapped with the experimentally determined binding mode of **10a** (pale green sticks) in humanized drHDAC10. d) Predicted binding mode of **10b** in humanized drHDAC10 (PDB ID 6VNQ) (magenta sticks) overlapped with the experimentally determined binding mode of **10b** (wheat sticks) in humanized drHDAC10. Binding site residues of in drHDAC10 (PDB ID 5TD7) are shown as white sticks, binding site residues of new crystals with the same colour of their own ligands respectively, water residues in the new crystals as red sphere, water residues in the humanized drHDAC10 (PDB ID 6VNQ) as pale green sphere and the catalytic zinc ion as cyan sphere.

## S2. LysoTracker results

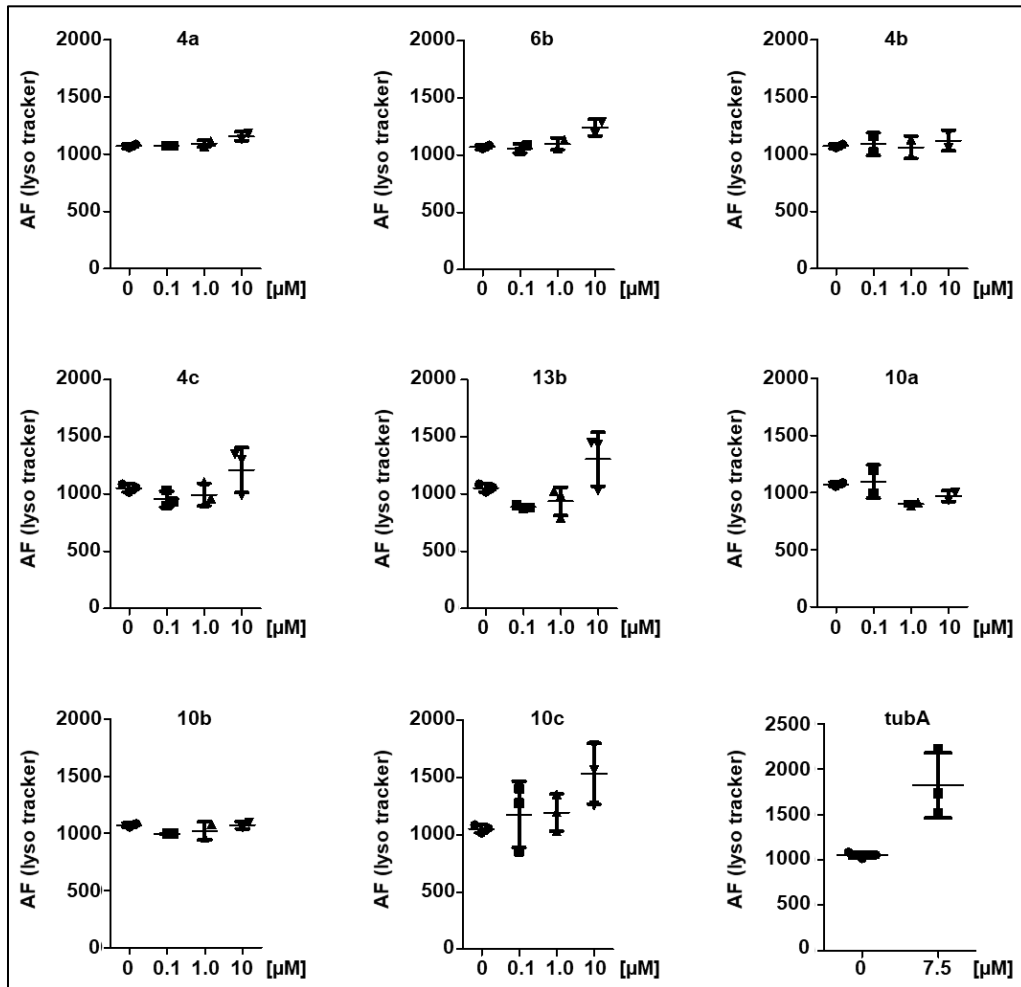

**Figure S6:** Expansion of the lysosomal compartment as a measure of HDAC10 inhibition, shown by increased fluorescence from the LysoTracker DND-99 probe. tubA: tubastatin A.

### S3. NMR, HPLC and HRMS characterization data

4a

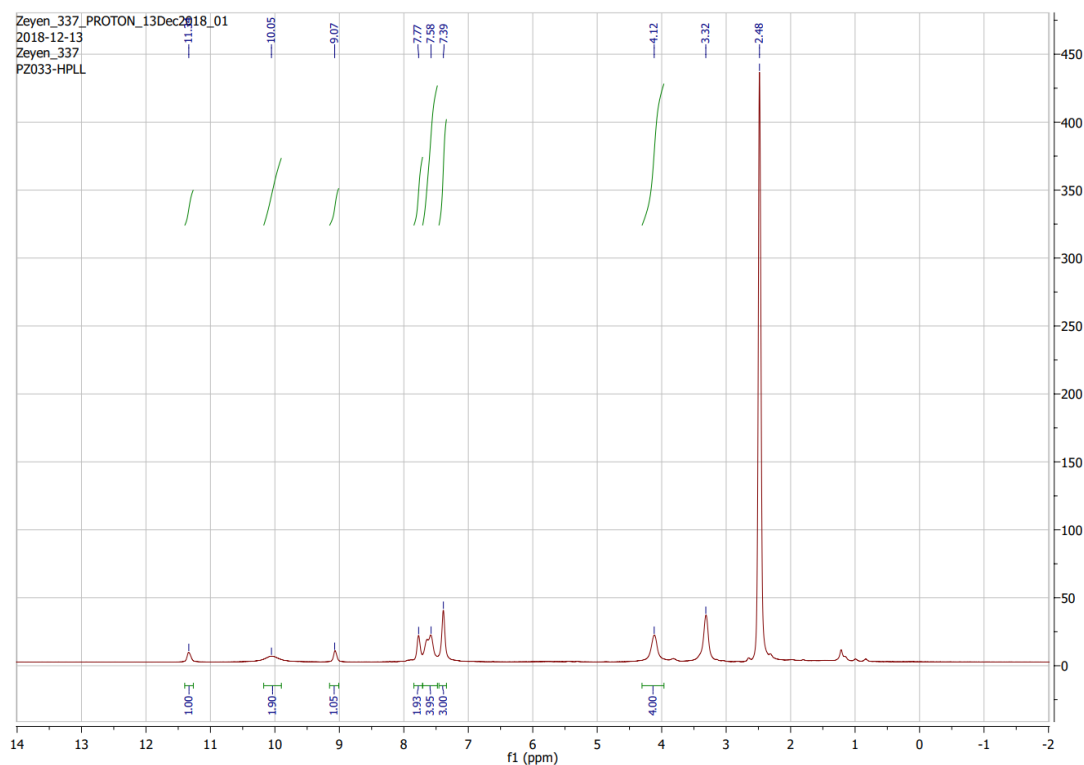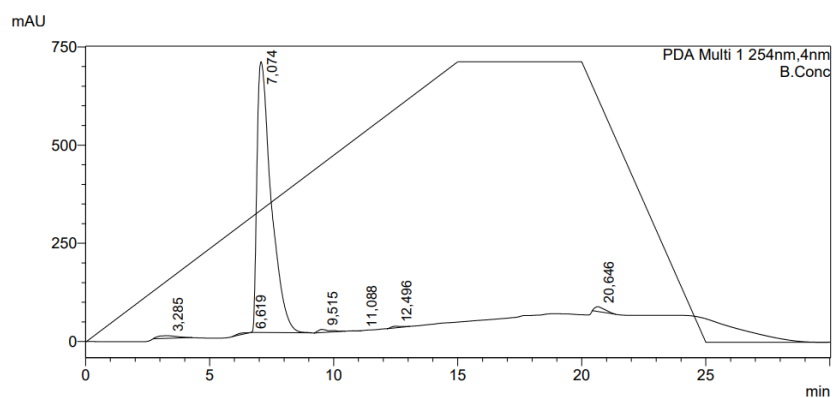

<Peak Table>

| PDA Ch1 254nm |           |         |          |
|---------------|-----------|---------|----------|
| Peak#         | Ret. Time | Area%   | Area     |
| 1             | 3.285     | 1.310   | 376331   |
| 2             | 6.619     | 0.336   | 96489    |
| 3             | 7.074     | 95.877  | 27539326 |
| 4             | 9.515     | 0.880   | 252858   |
| 5             | 11.088    | -0.014  | -4003    |
| 6             | 12.496    | 0.375   | 107625   |
| 7             | 20.646    | 1.235   | 354868   |
| Total         |           | 100.000 | 28723494 |

PZ033 #1-13 RT: 0.02-0.46 AV: 13 NL: 4.69E5  
T: FTMS + c NSI Full ms [150.00-800.00]

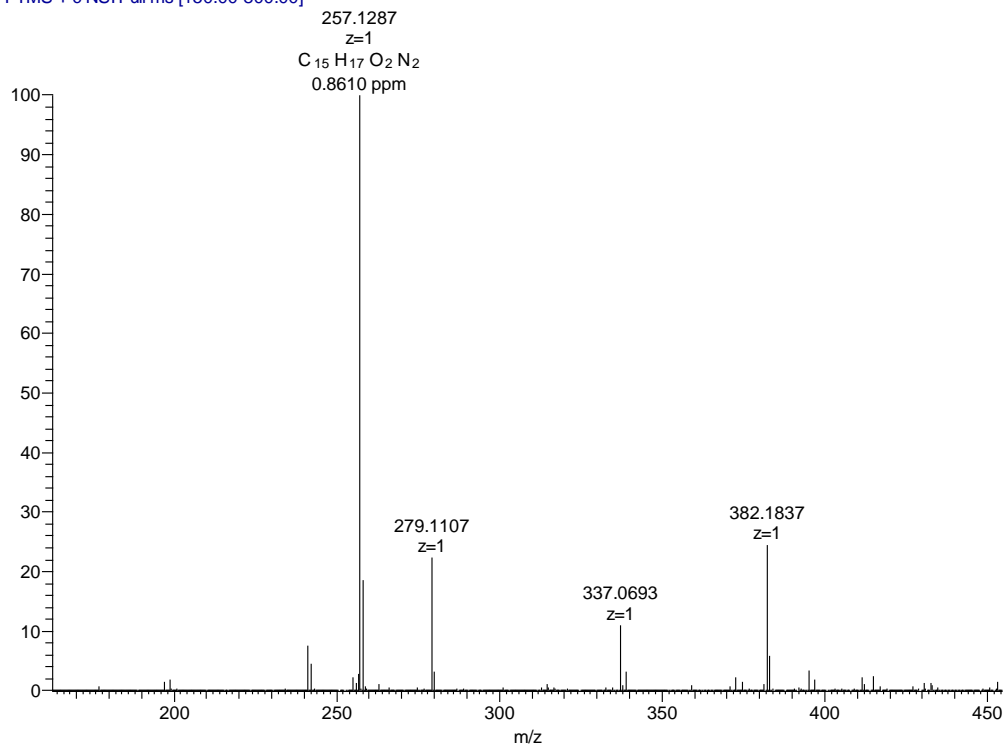

4b

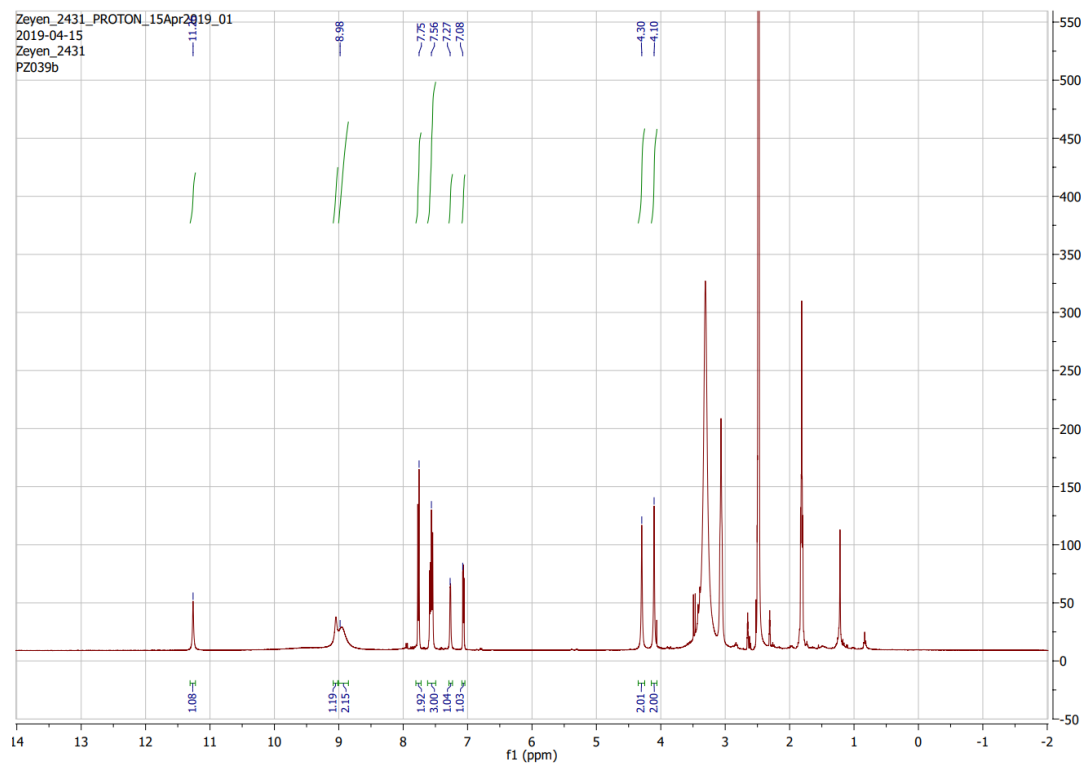

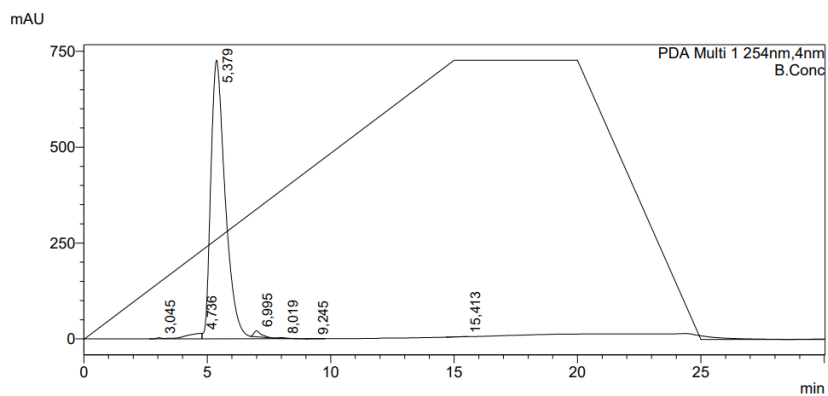

<Peak Table>

| Peak# | Ret. Time | Area%   | Area     | Height |
|-------|-----------|---------|----------|--------|
| 1     | 3,045     | 0,153   | 47139    | 3157   |
| 2     | 4,736     | 2,046   | 630557   | 14245  |
| 3     | 5,379     | 96,571  | 29760281 | 726285 |
| 4     | 6,995     | 1,028   | 316648   | 15671  |
| 5     | 8,019     | 0,121   | 37339    | 1925   |
| 6     | 9,245     | 0,044   | 13420    | 661    |
| 7     | 15,413    | 0,038   | 11699    | 141    |
| Total |           | 100,000 | 30817083 | 762085 |

PZ 039 #1-16 RT: 0.00-0.43 AV: 16 NL: 2.14E7  
T: FTMS + c NSI Full ms [150.00-800.00]

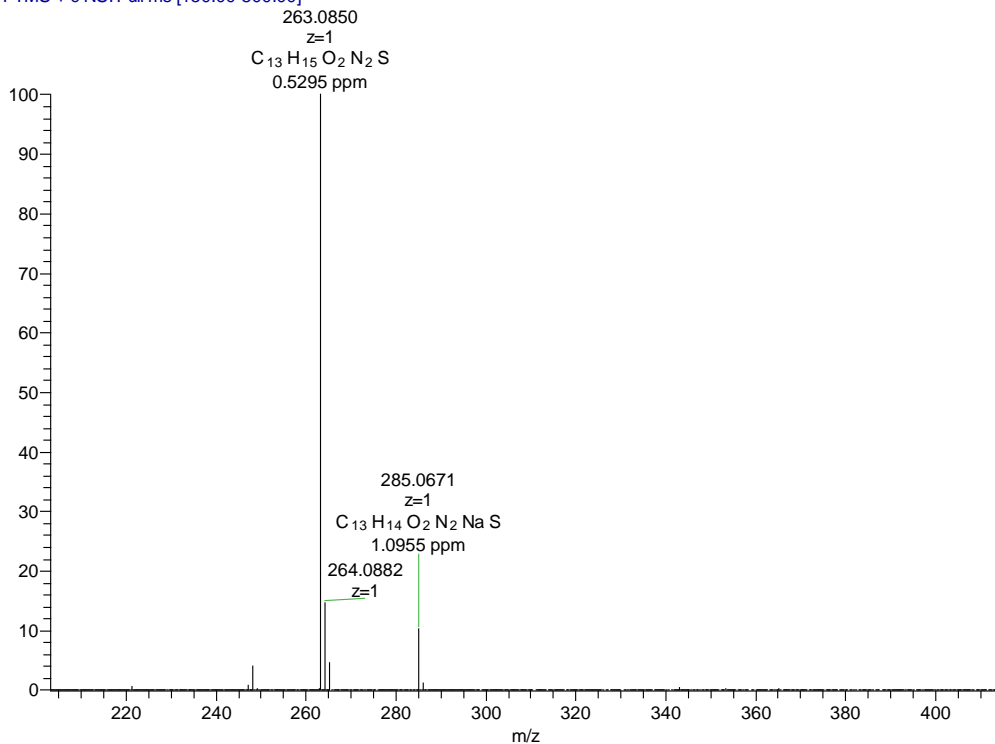

# 4c

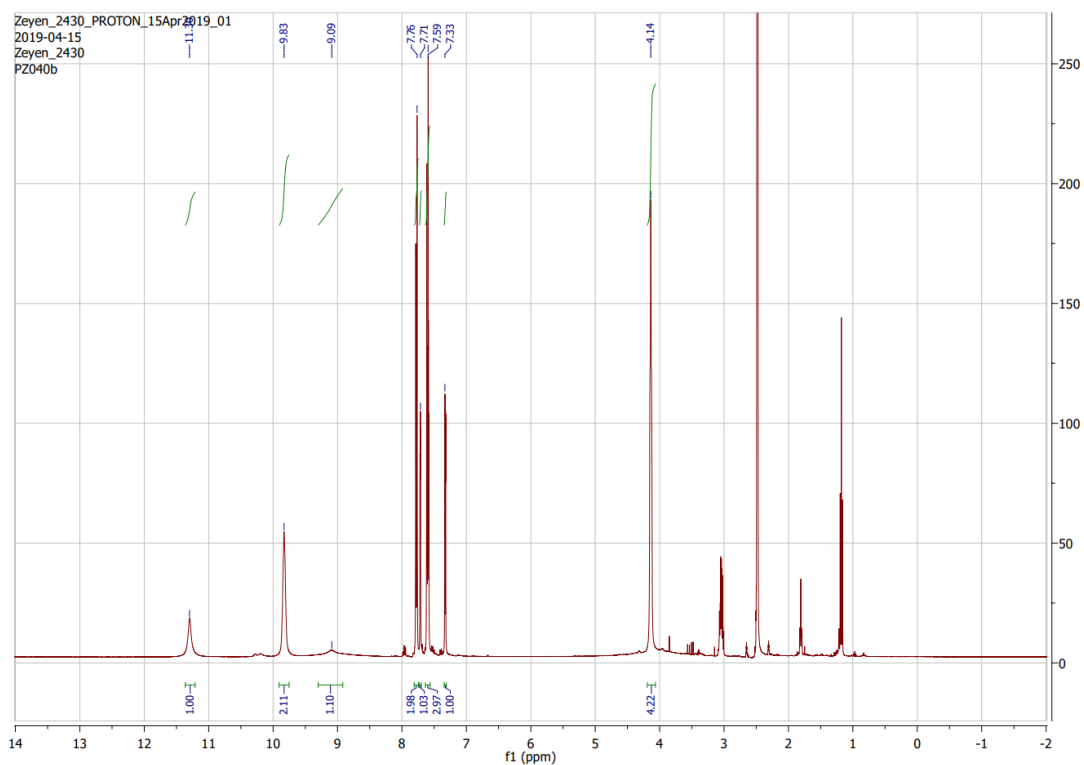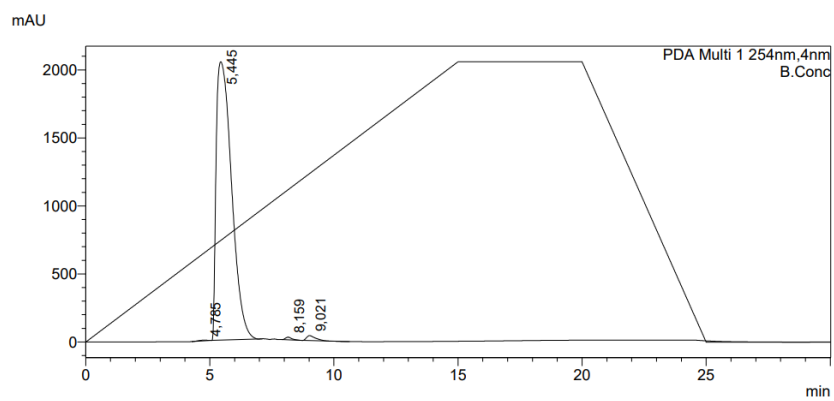

## <Peak Table>

| PDA Ch1 254nm |           |         |          |         |
|---------------|-----------|---------|----------|---------|
| Peak#         | Ret. Time | Area%   | Area     | Height  |
| 1             | 4.785     | 0.151   | 135144   | 4739    |
| 2             | 5.445     | 98.416  | 88367647 | 2045773 |
| 3             | 8.159     | 0.383   | 343688   | 19792   |
| 4             | 9.021     | 1.051   | 943727   | 36948   |
| Total         |           | 100.000 | 89790206 | 2107251 |



PZ040 #1-16 RT: 0.02-0.45 AV: 16 NL: 1.24E8  
T: FTMS + c NSIFull ms [150.00-800.00]

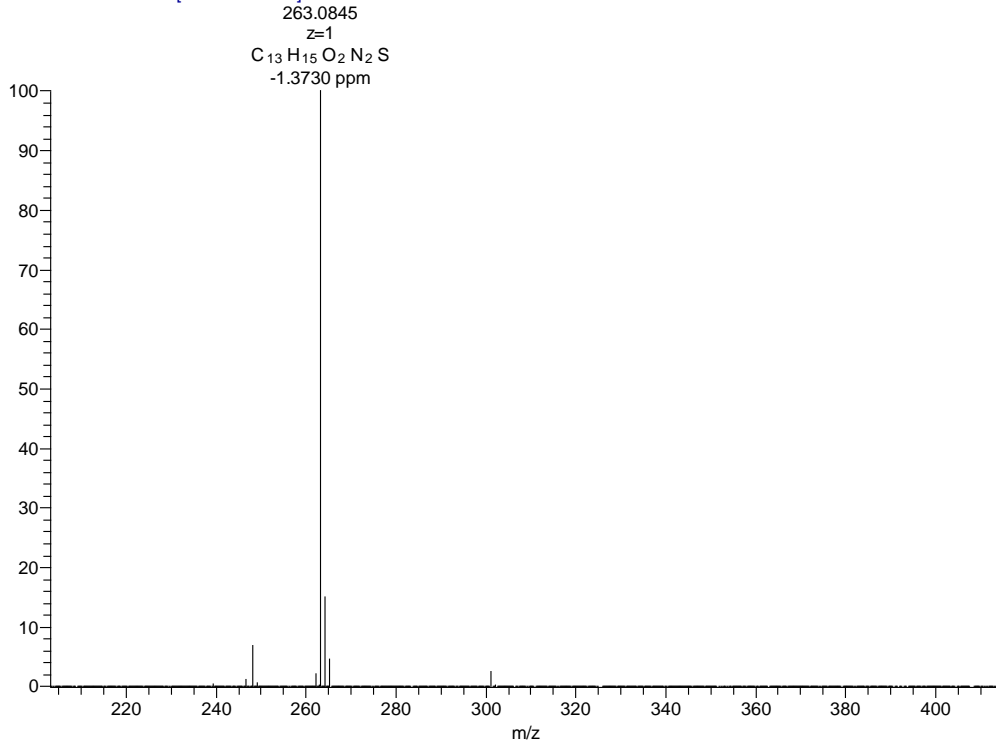

6a

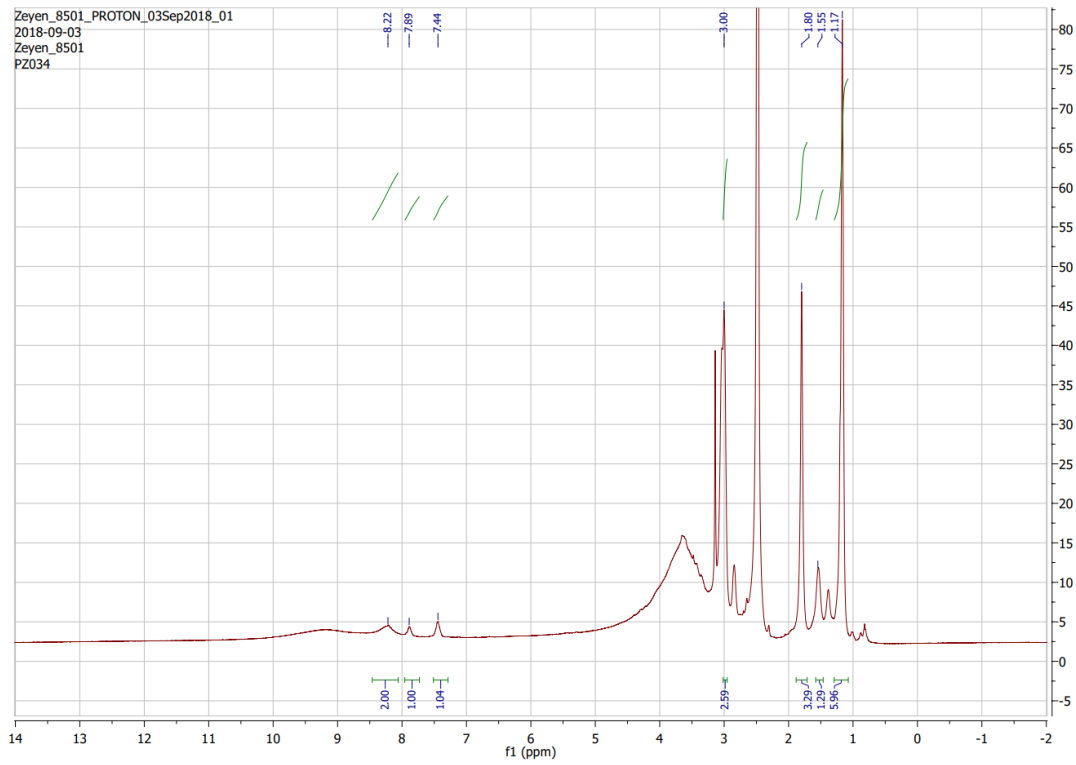

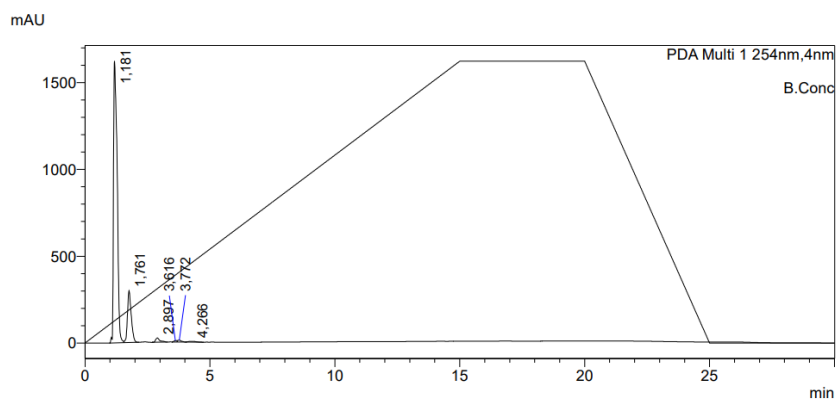

PDA Ch1 254nm

| Peak# | Ret. Time | Area     | Height  | Area%   |
|-------|-----------|----------|---------|---------|
| 1     | 1,181     | 16472524 | 1623019 | 81,625  |
| 2     | 1,761     | 3130190  | 298272  | 15,511  |
| 3     | 2,897     | 296083   | 24683   | 1,467   |
| 4     | 3,616     | 70273    | 8348    | 0,348   |
| 5     | 3,772     | 112655   | 10969   | 0,558   |
| 6     | 4,266     | 99058    | 4628    | 0,491   |
| Total |           | 20180783 | 1969919 | 100,000 |

PZ034 #1-12 RT: 0.02-0.42 AV: 12 NL: 7.12E5  
T: FTMS + c NSI Full ms [150.00-800.00]

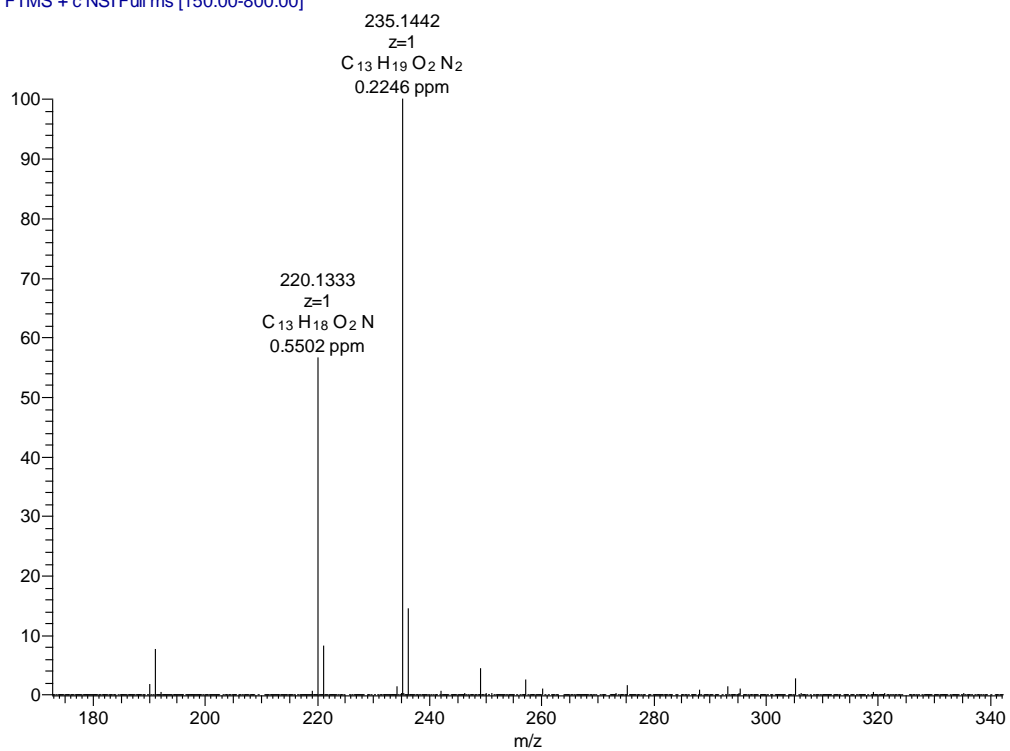

6b

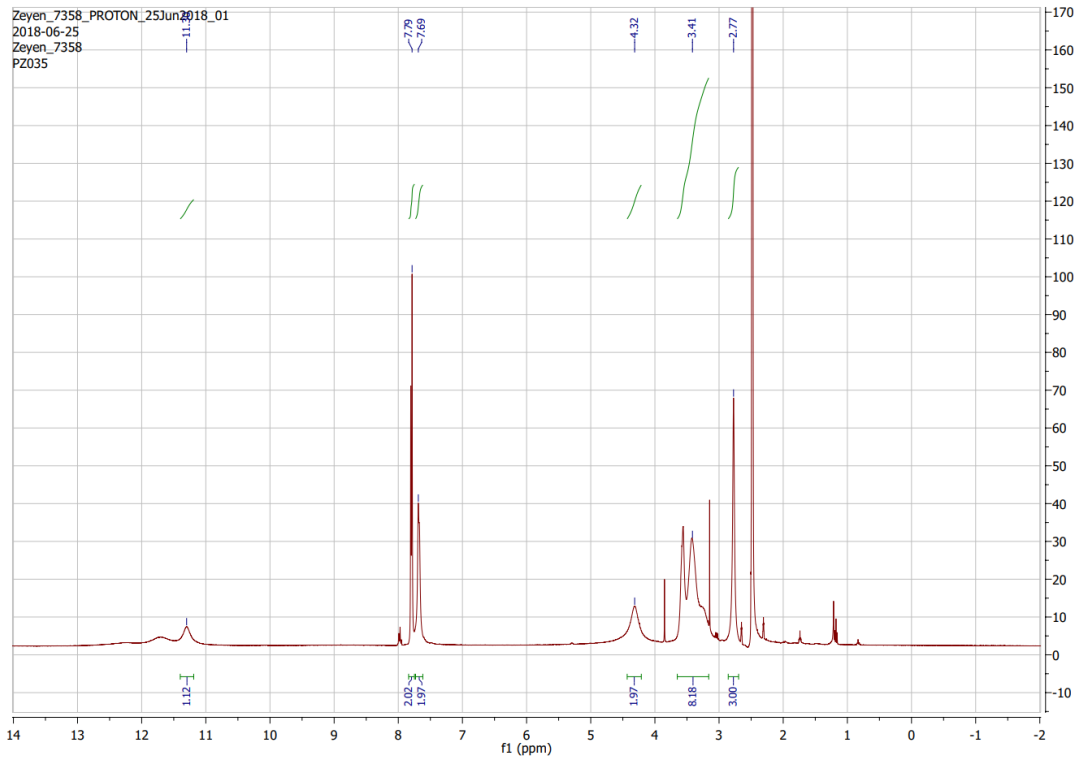

mAU

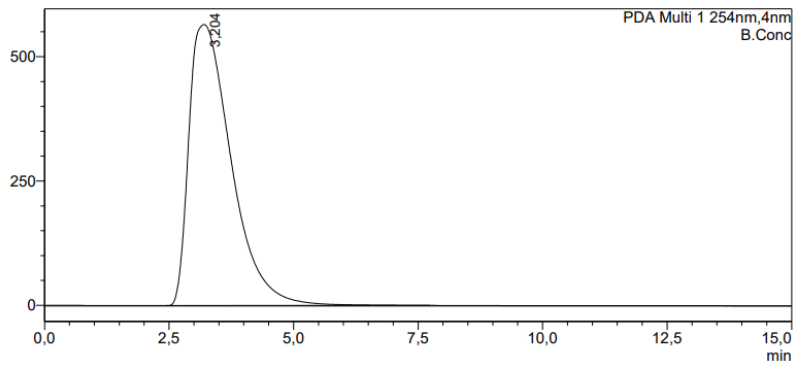

mAU

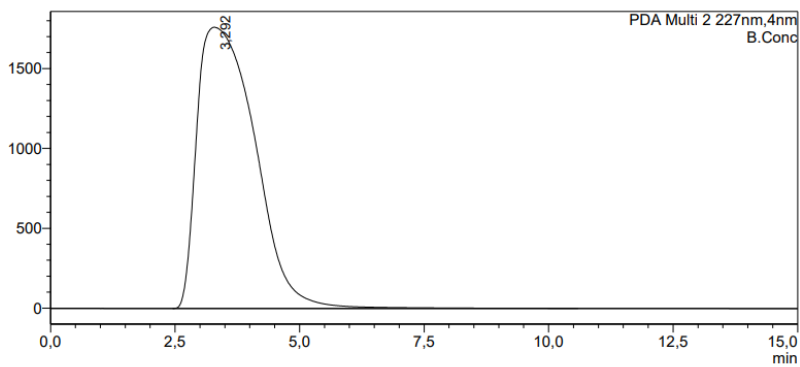

<Peak Table>

PDA Ch1 254nm

| Peak# | Ret. Time | Area%   | Area     | Height |
|-------|-----------|---------|----------|--------|
| 1     | 3,204     | 100.000 | 33400290 | 565109 |
| Total |           | 100.000 | 33400290 | 565109 |

PDA Ch2 227nm

| Peak# | Ret. Time | Area%   | Area      | Height  |
|-------|-----------|---------|-----------|---------|
| 1     | 3,292     | 100.000 | 142730137 | 1760264 |
| Total |           | 100.000 | 142730137 | 1760264 |

PZ 035 #1-13 RT: 0.02-0.44 AV: 13 NL: 6.60E5  
T: FTMS + c NSI Full ms [150.00-800.00]

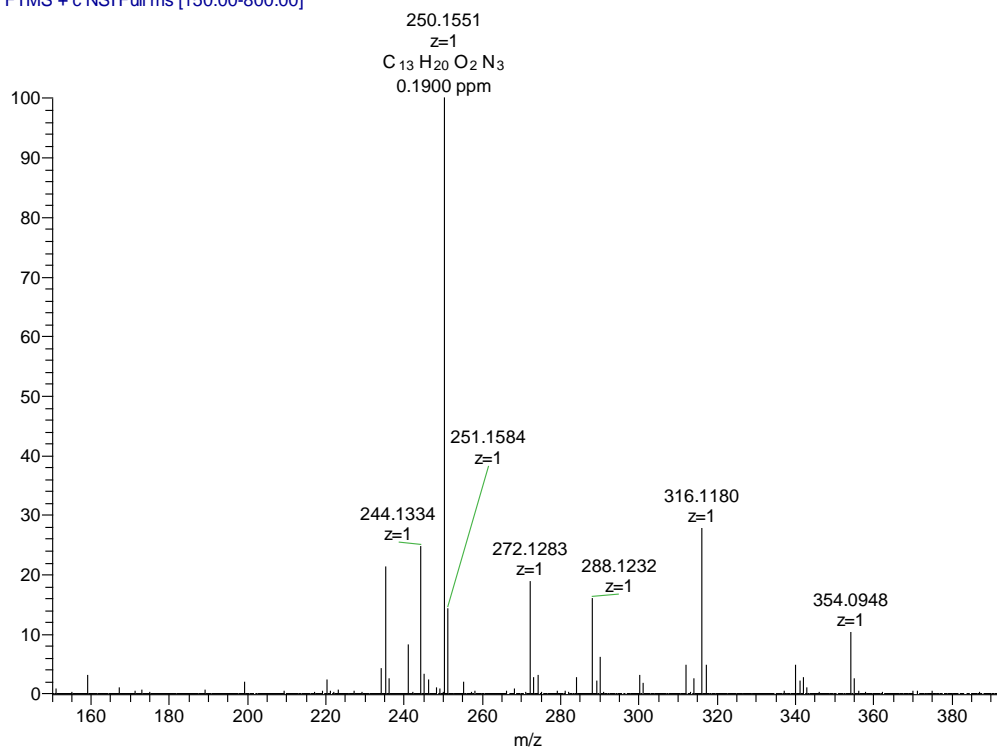

# 10a

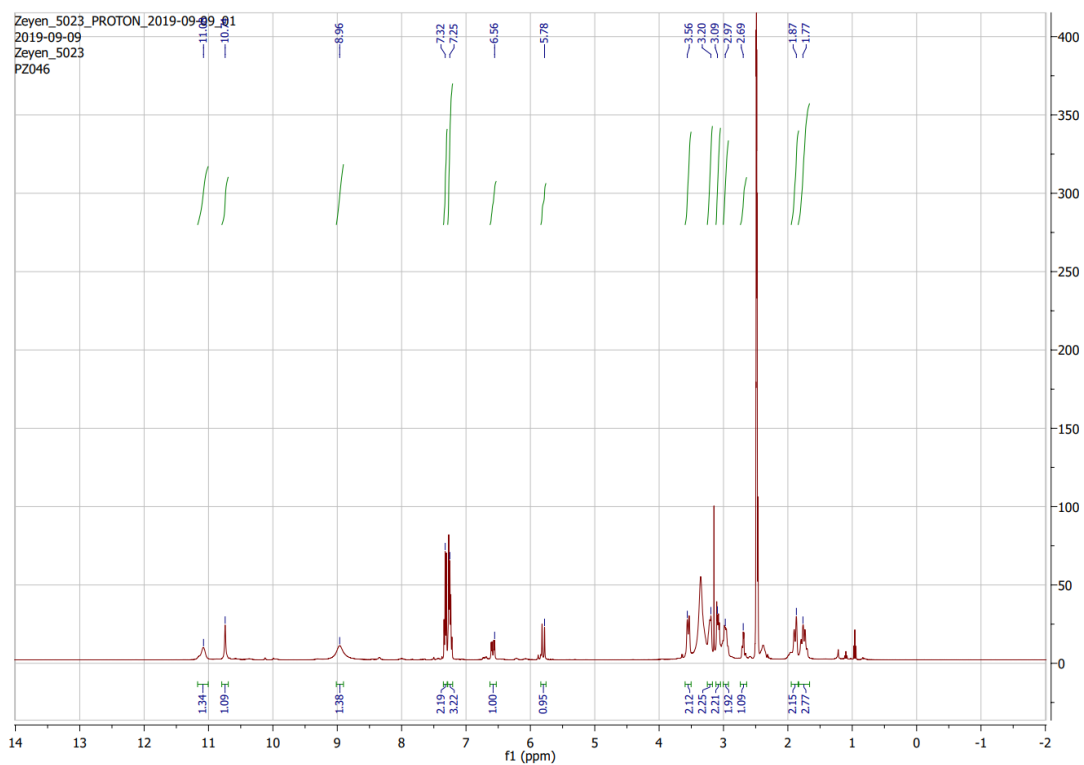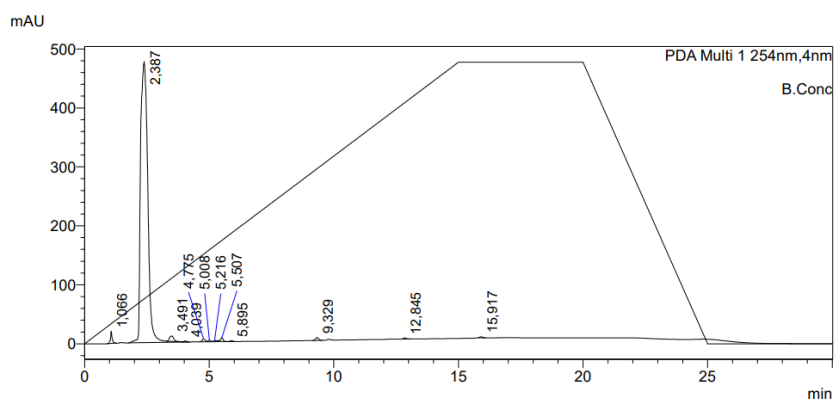

| Peak# | Ret. Time | Area    | Height | Area%   |
|-------|-----------|---------|--------|---------|
| 1     | 1,066     | 92850   | 20050  | 0.931   |
| 2     | 2,387     | 9548788 | 475509 | 95.776  |
| 3     | 3,491     | 108298  | 9145   | 1.086   |
| 4     | 4,039     | 12772   | 1706   | 0.128   |
| 5     | 4,775     | 39381   | 4704   | 0.395   |
| 6     | 5,008     | 20544   | 2510   | 0.206   |
| 7     | 5,216     | 26441   | 1763   | 0.265   |
| 8     | 5,507     | 45325   | 6716   | 0.455   |
| 9     | 5,895     | 10286   | 1365   | 0.103   |
| 10    | 9,329     | 39721   | 4887   | 0.398   |
| 11    | 12,845    | 15067   | 1983   | 0.151   |
| 12    | 15,917    | 10494   | 1538   | 0.105   |
| Total |           | 9969967 | 531876 | 100.000 |

PZ046 #1-16 RT: 0.02-0.45 AV: 16 NL: 9.29E6  
T: FTMS + c NSIFull ms [150.00-800.00]

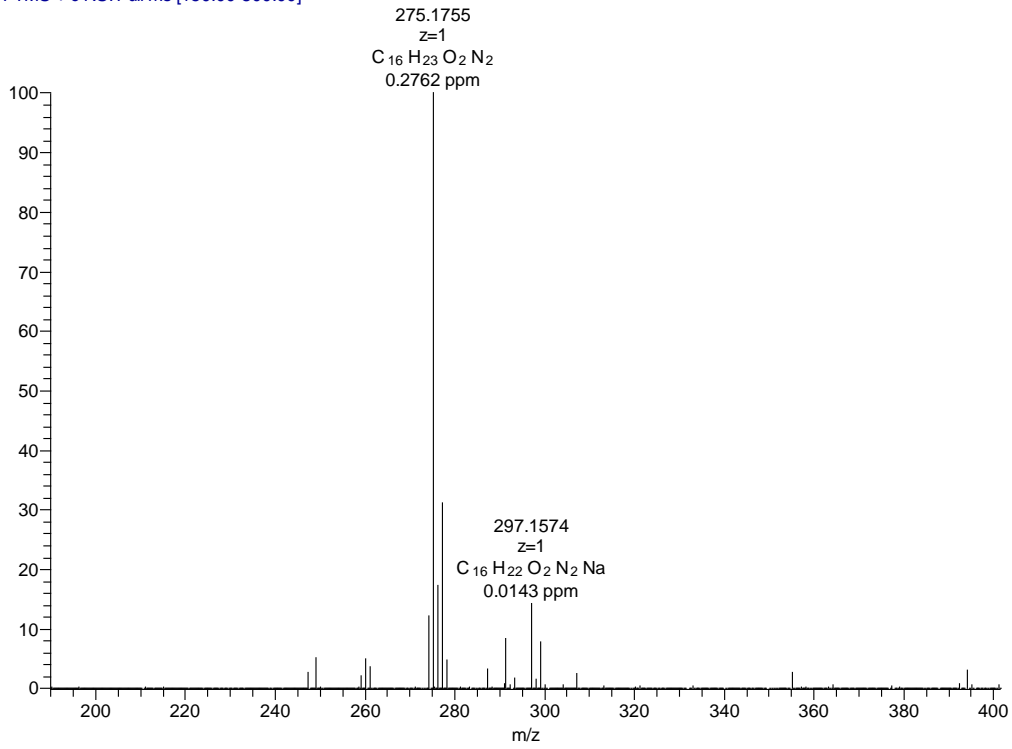

### 10b

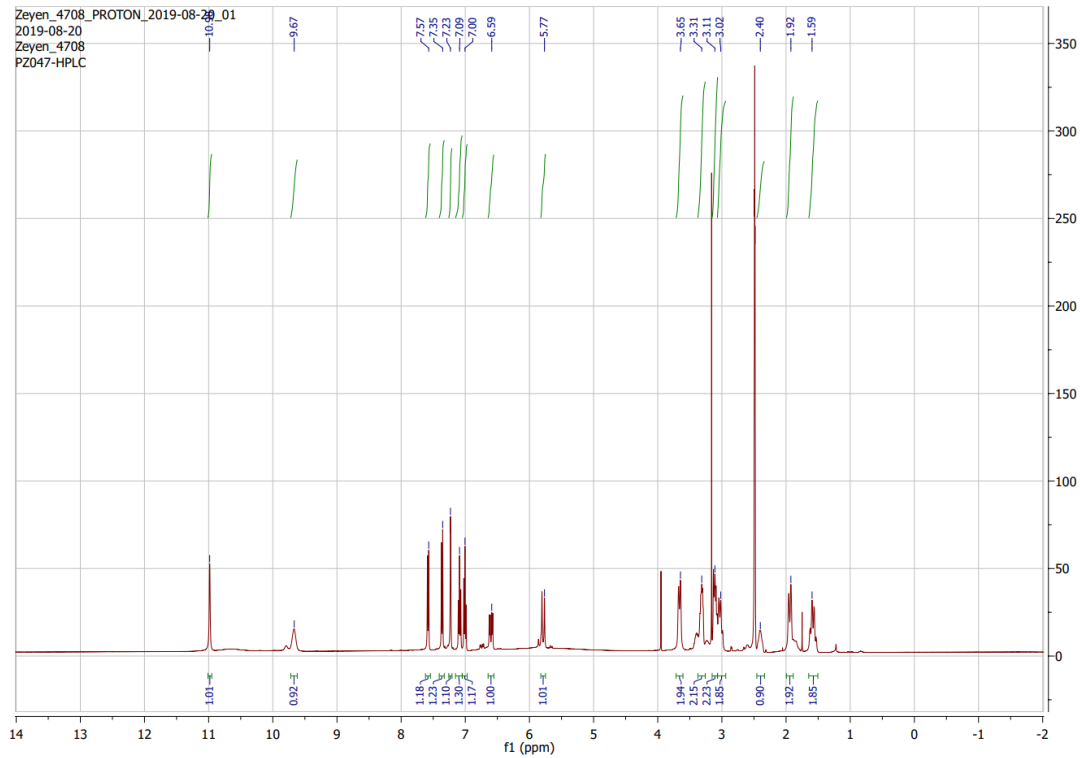



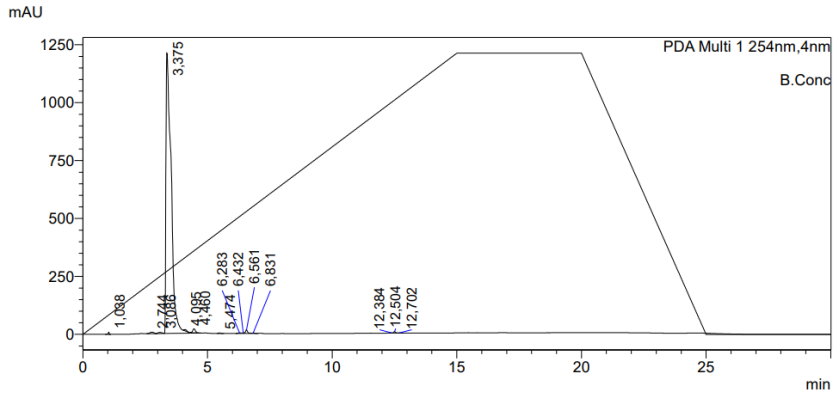

PDA Ch1 254nm

| Peak# | Ret. Time | Area     | Height  | Area%   |
|-------|-----------|----------|---------|---------|
| 1     | 1,038     | 26772    | 9753    | 0,149   |
| 2     | 2,744     | 69589    | 6203    | 0,386   |
| 3     | 3,086     | 59964    | 5420    | 0,333   |
| 4     | 3,375     | 17485190 | 1209874 | 97,038  |
| 5     | 4,095     | 37720    | 5097    | 0,209   |
| 6     | 4,460     | 126787   | 17183   | 0,704   |
| 7     | 5,474     | 12706    | 2437    | 0,071   |
| 8     | 6,283     | 23964    | 2308    | 0,133   |
| 9     | 6,432     | 14535    | 2785    | 0,081   |
| 10    | 6,561     | 88594    | 15847   | 0,492   |
| 11    | 6,831     | 24889    | 2370    | 0,138   |
| 12    | 12,384    | 6378     | 1198    | 0,035   |
| 13    | 12,504    | 34648    | 6878    | 0,192   |
| 14    | 12,702    | 7087     | 1406    | 0,039   |
| Total |           | 18018823 | 1288758 | 100,000 |

PZ047 #1-16 RT: 0.02-0.44 AV: 16 NL: 6.01E7  
 T: FTMS + c NSI Full ms [150.00-800.00]

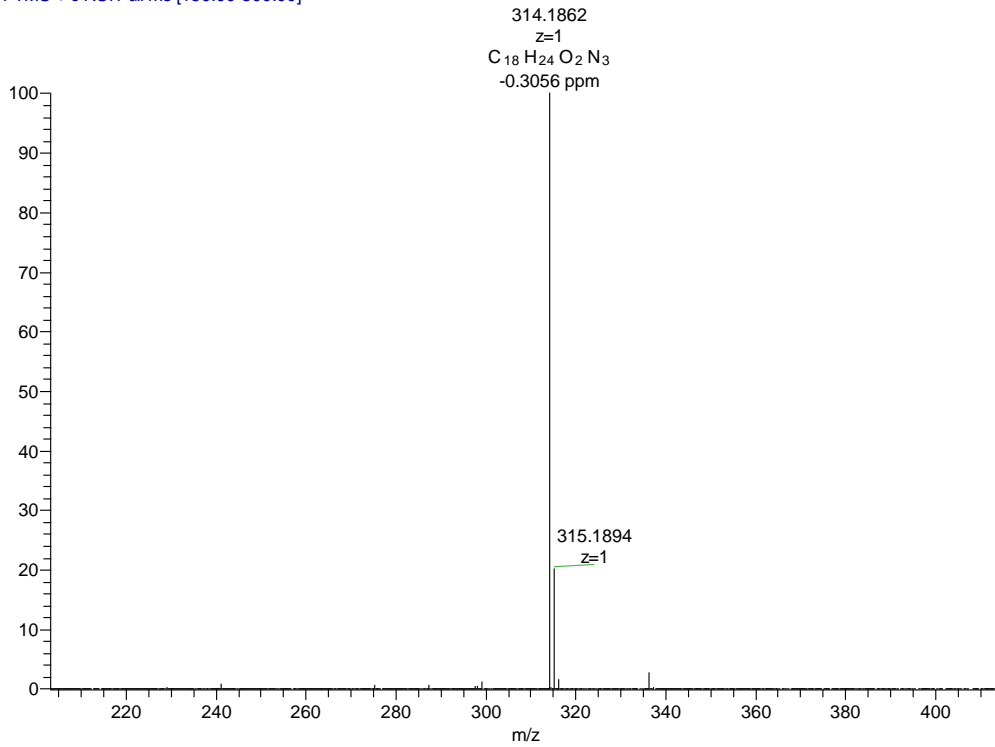

# 10c

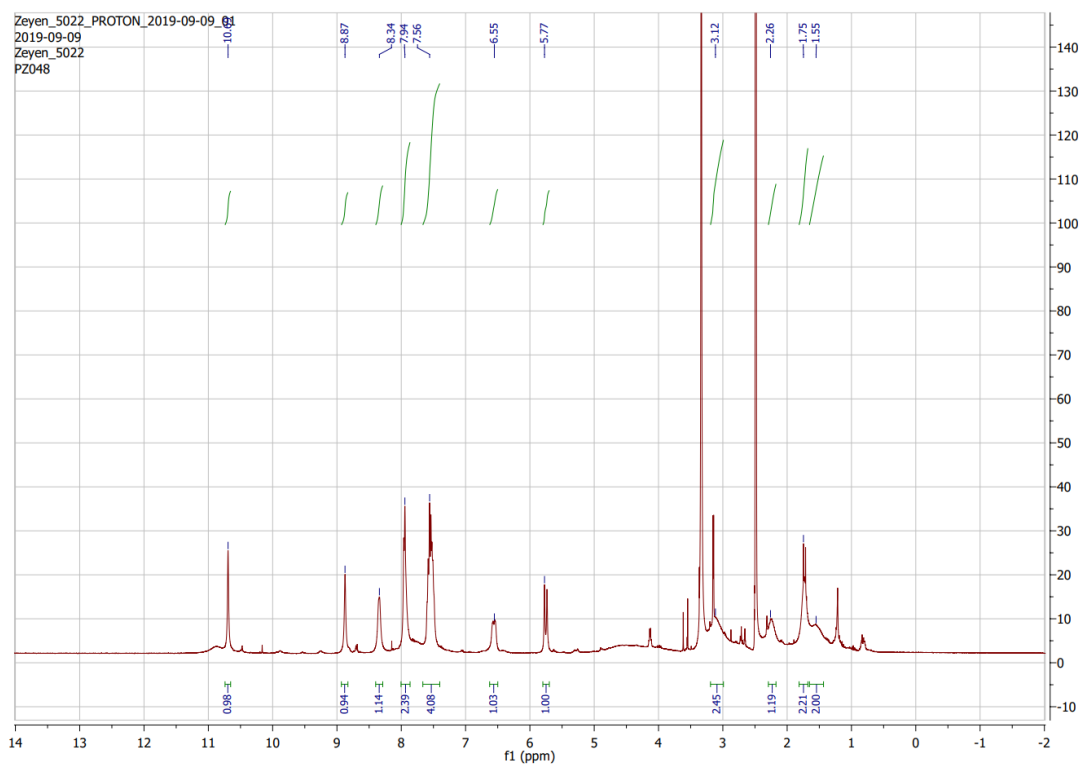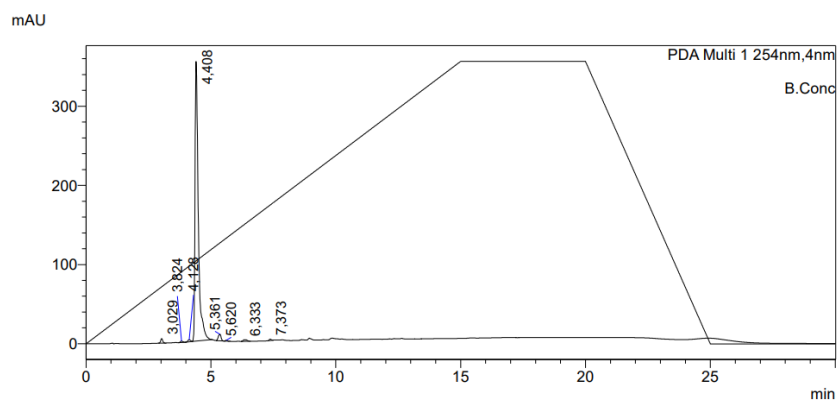

PDA Ch1 254nm

| Peak# | Ret. Time | Area    | Height | Area%   |
|-------|-----------|---------|--------|---------|
| 1     | 3.029     | 31630   | 5674   | 0.936   |
| 2     | 3.824     | 12062   | 1848   | 0.357   |
| 3     | 4.128     | 19469   | 2645   | 0.576   |
| 4     | 4.408     | 3214969 | 353339 | 95.147  |
| 5     | 5.361     | 63437   | 8237   | 1.877   |
| 6     | 5.620     | 6890    | 1340   | 0.204   |
| 7     | 6.333     | 21209   | 1991   | 0.628   |
| 8     | 7.373     | 9291    | 1762   | 0.275   |
| Total |           | 3378956 | 376836 | 100.000 |

PZ048 #1-16 RT: 0.01-0.44 AV: 16 NL: 4.13E7  
T: FTMS + c NSIFull ms [150.00-800.00]

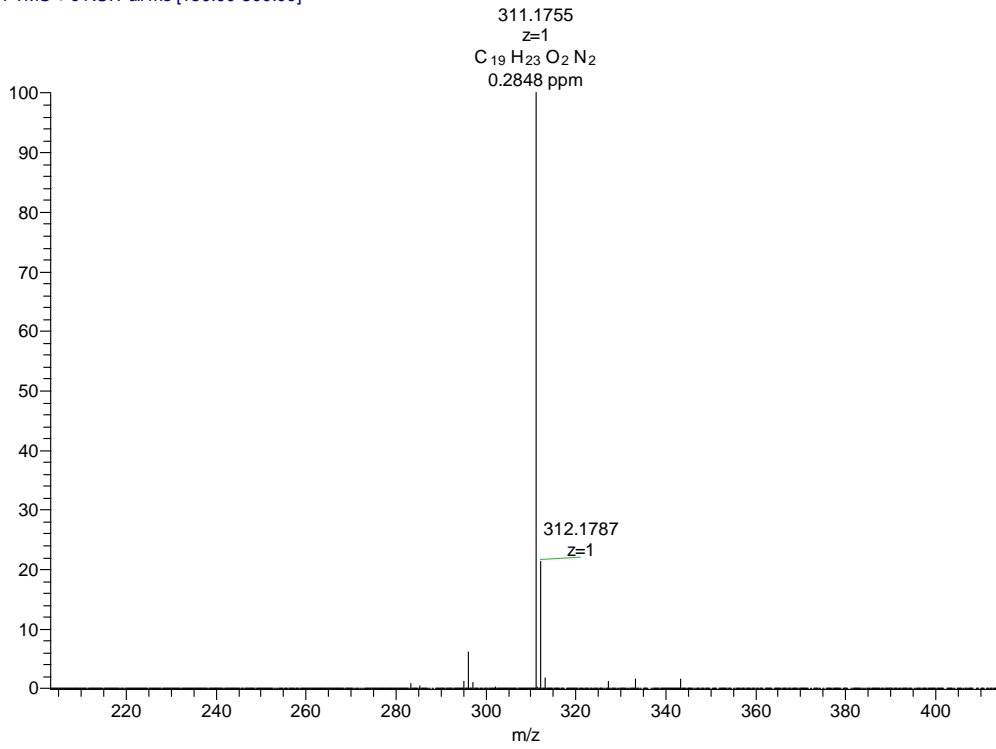

### 10d

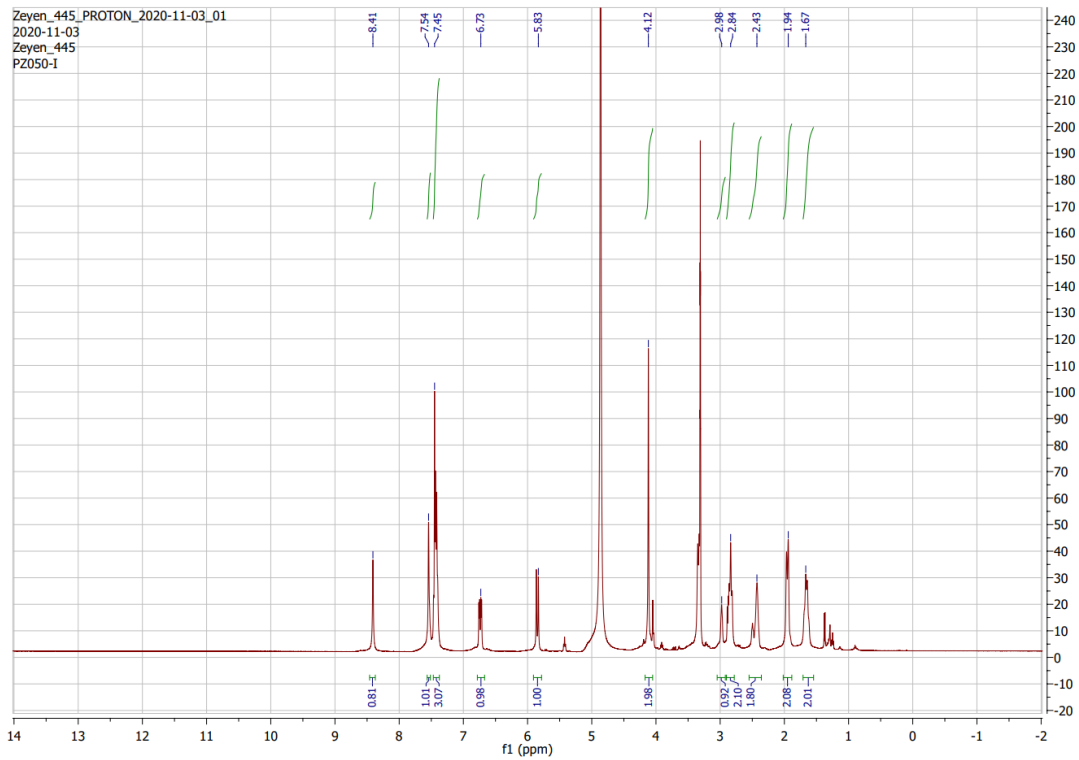

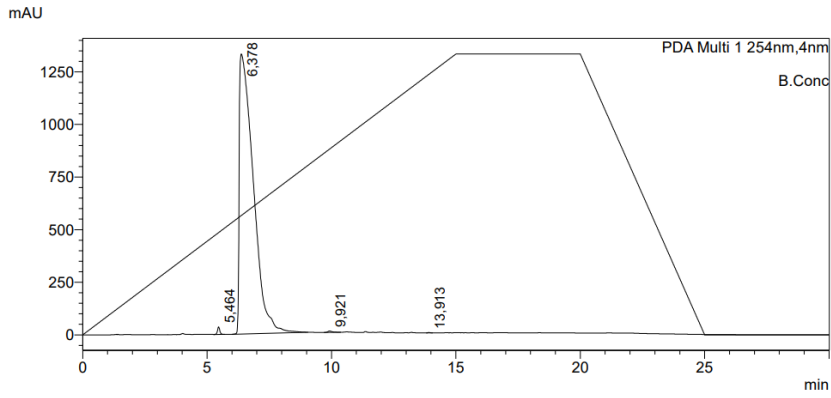

PDA Ch1 254nm

| Peak# | Ret. Time | Area     | Height  | Area%   |
|-------|-----------|----------|---------|---------|
| 1     | 5.464     | 225687   | 35371   | 0.430   |
| 2     | 6.378     | 52138947 | 1330955 | 99.388  |
| 3     | 9.921     | 87689    | 6886    | 0.167   |
| 4     | 13.913    | 7480     | 1361    | 0.014   |
| Total |           | 52459803 | 1374573 | 100.000 |

PZ050\_201207112058 #3-16 RT: 0.09-0.56 AV: 14 NL: 4.98E5  
 T: FTMS + p NSI Full ms [150.00-2000.00]

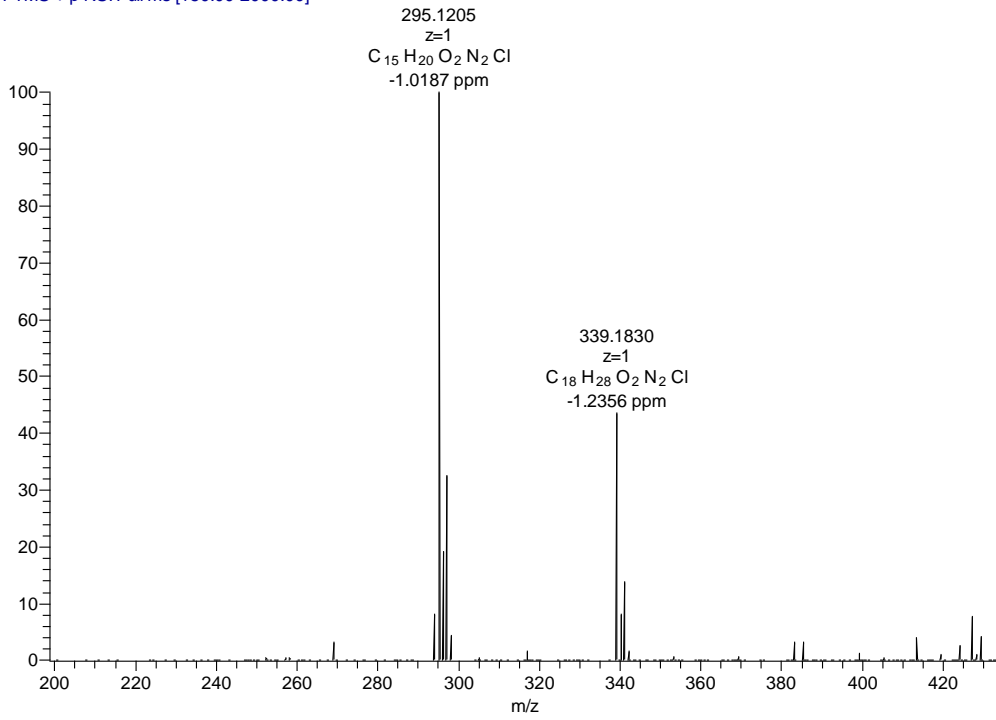

# 10e

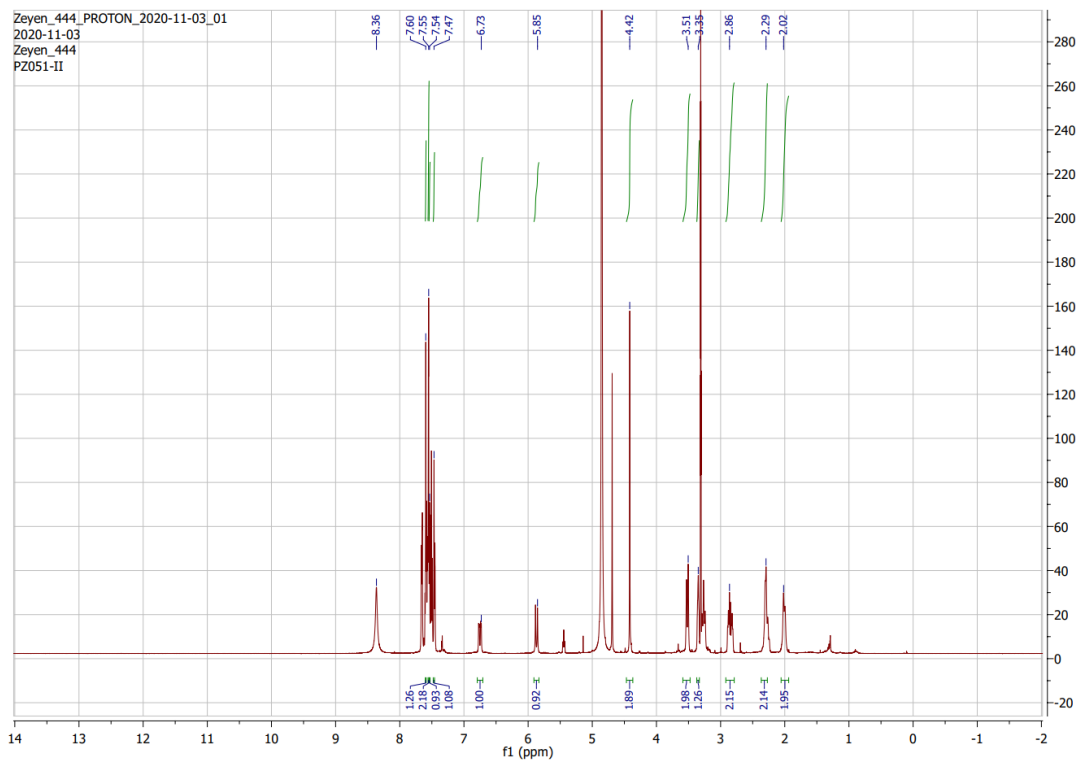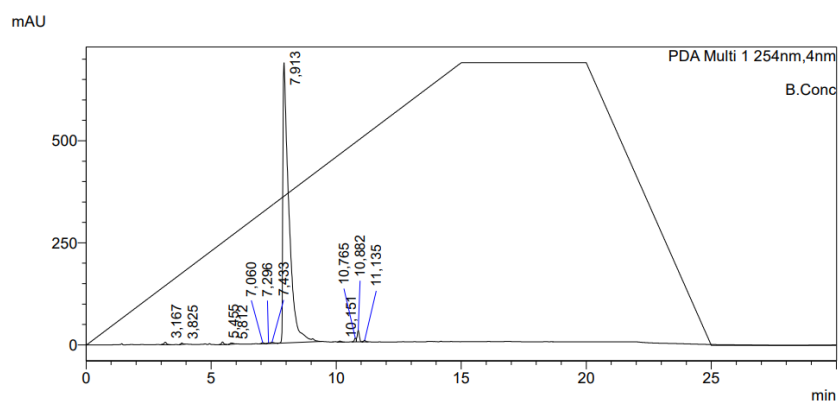

PDA Ch1 254nm

| Peak# | Ret. Time | Area     | Height | Area%   |
|-------|-----------|----------|--------|---------|
| 1     | 3,167     | 46538    | 6287   | 0.388   |
| 2     | 3,825     | 17129    | 3404   | 0.143   |
| 3     | 5,455     | 38762    | 6404   | 0.323   |
| 4     | 5,812     | 27129    | 3047   | 0.226   |
| 5     | 7,060     | 21124    | 3133   | 0.176   |
| 6     | 7,296     | 15977    | 1905   | 0.133   |
| 7     | 7,433     | 23503    | 2874   | 0.196   |
| 8     | 7,913     | 11565423 | 686388 | 96.382  |
| 9     | 10,151    | 14657    | 2326   | 0.122   |
| 10    | 10,765    | 46393    | 9092   | 0.387   |
| 11    | 10,882    | 163459   | 28591  | 1.362   |
| 12    | 11,135    | 19496    | 3839   | 0.162   |
| Total |           | 11999589 | 757289 | 100,000 |

PZ051(+)\_210113090211 #3-17 RT: 0.08-0.48 AV: 15 NL: 7.07E6  
T: FTMS + p NSIFull ms [150.00-2000.00]

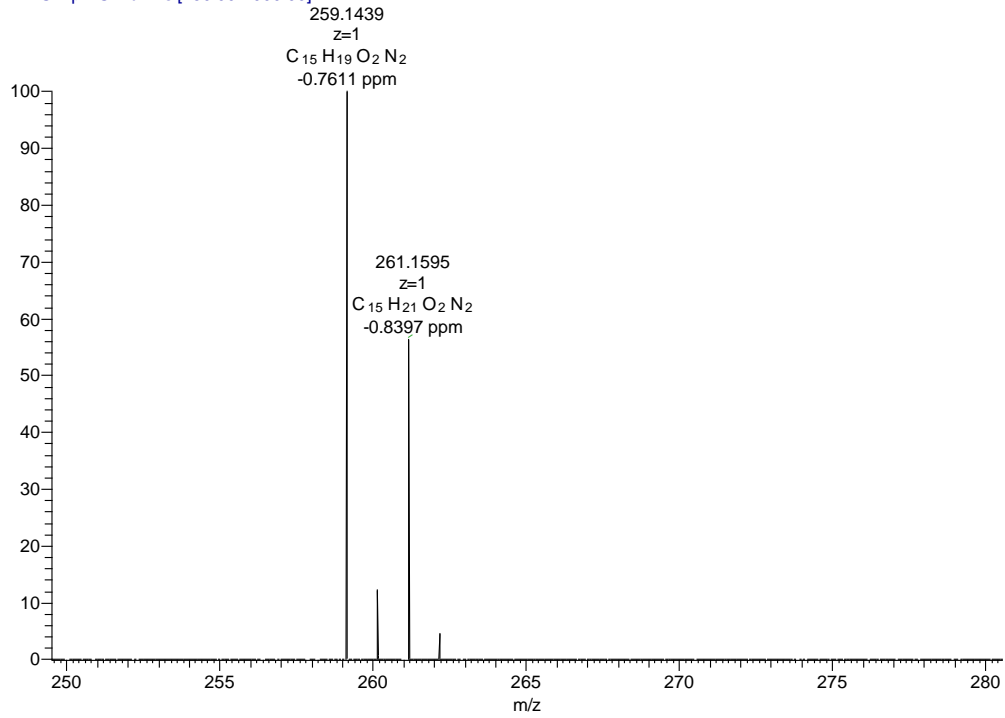

### 10f

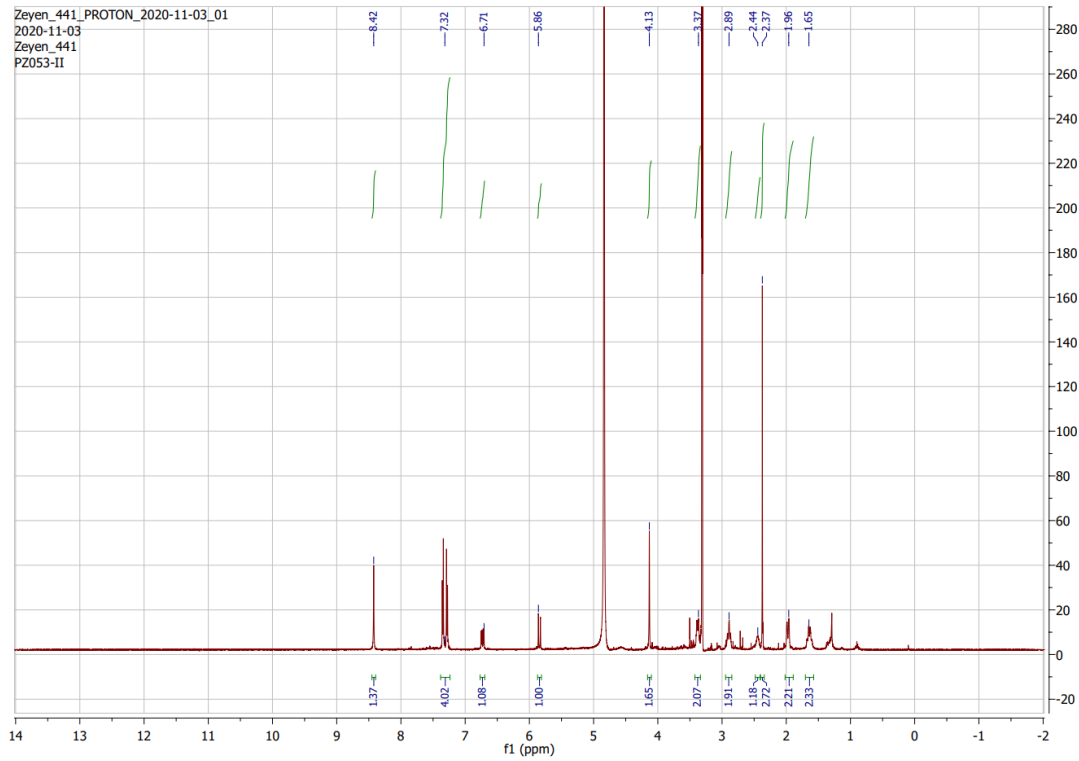



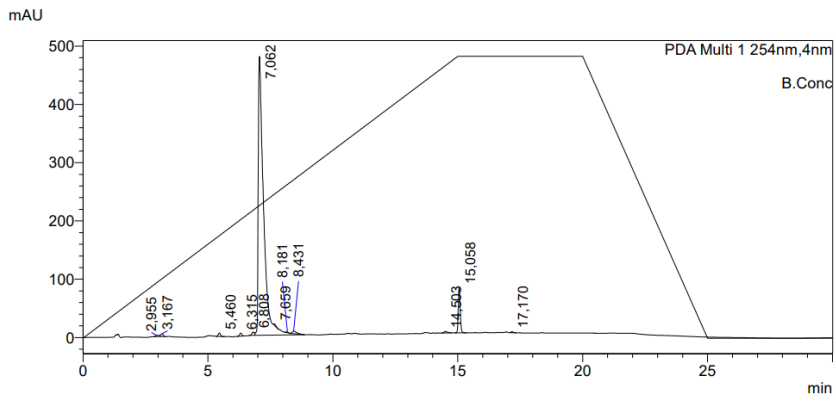

PDA Ch1 254nm

| Peak# | Ret. Time | Area    | Height | Area%   |
|-------|-----------|---------|--------|---------|
| 1     | 2,955     | 21576   | 1876   | 0,277   |
| 2     | 3,167     | 32110   | 4852   | 0,412   |
| 3     | 5,460     | 36463   | 5804   | 0,468   |
| 4     | 6,315     | 34223   | 5248   | 0,439   |
| 5     | 6,808     | 41505   | 5558   | 0,533   |
| 6     | 7,062     | 7091610 | 478695 | 91,033  |
| 7     | 7,659     | 14813   | 2409   | 0,190   |
| 8     | 8,181     | 8977    | 1621   | 0,115   |
| 9     | 8,431     | 53105   | 4388   | 0,682   |
| 10    | 14,503    | 23757   | 2598   | 0,305   |
| 11    | 15,058    | 420888  | 77318  | 5,403   |
| 12    | 17,170    | 11151   | 2074   | 0,143   |
| Total |           | 7790178 | 592441 | 100,000 |

PZ053(+)\_210113090436 #12-13 RT: 0.33-0.36 AV: 2 NL: 1.12E7  
T: FTMS + p NSI Full ms [150.00-2000.00]

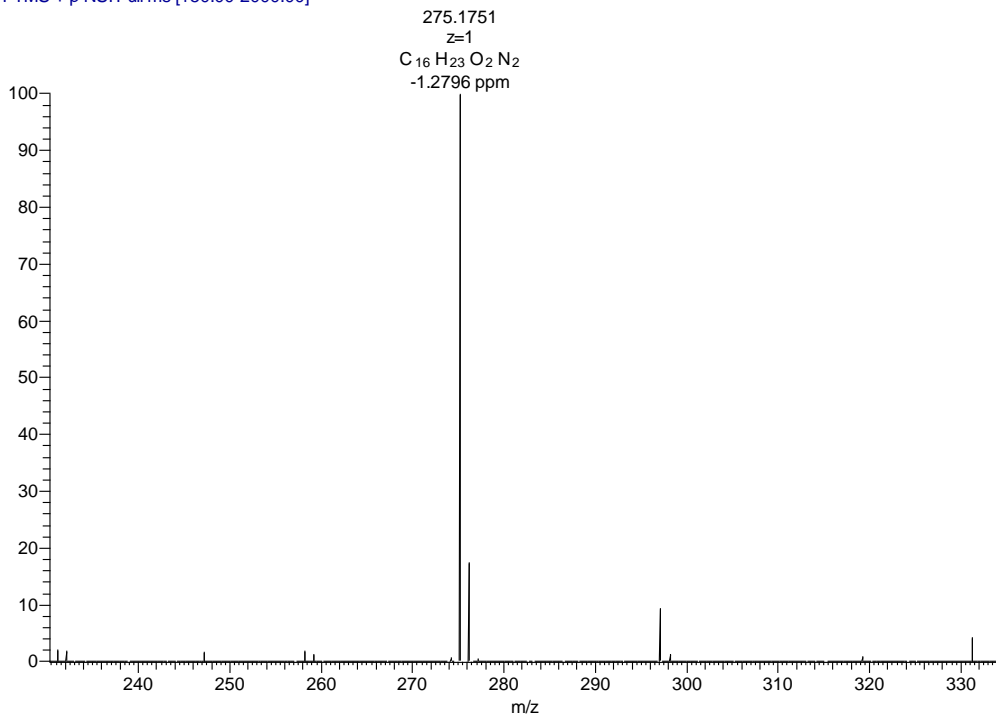

# 10g

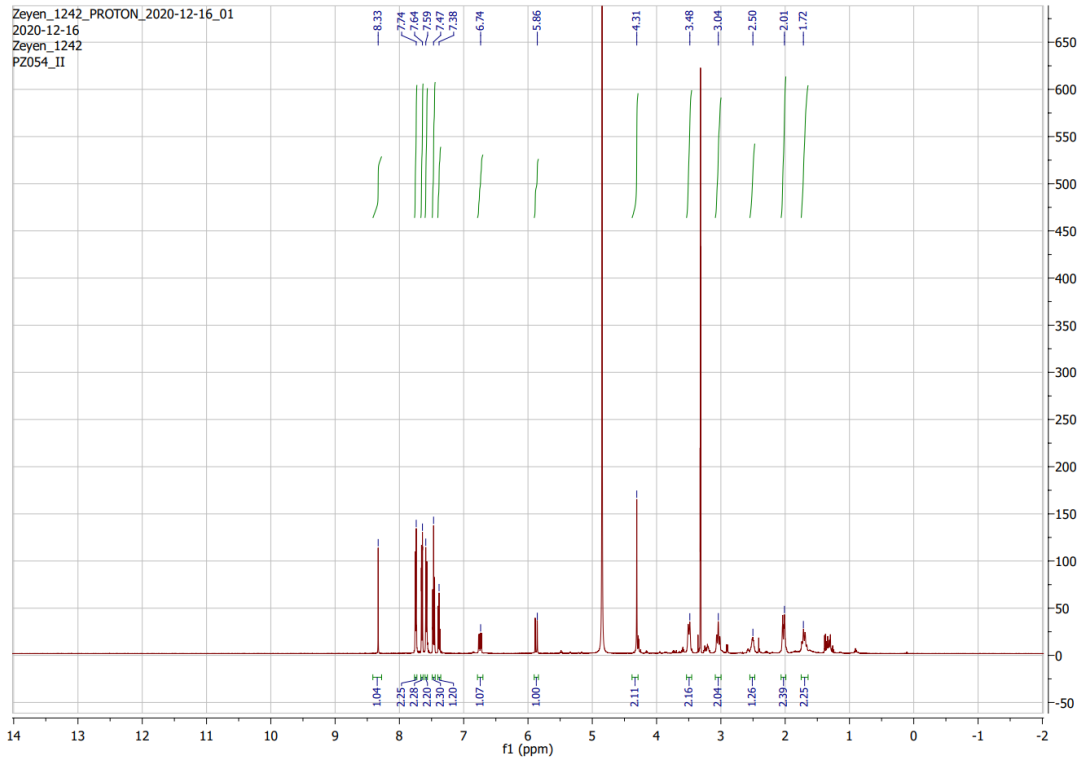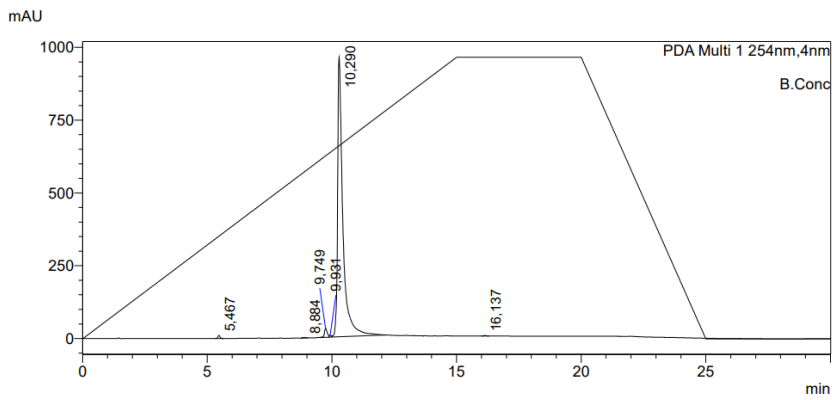

| Peak# | Ret. Time | Area     | Height  | Area%   |
|-------|-----------|----------|---------|---------|
| 1     | 5.467     | 61540    | 10399   | 0.422   |
| 2     | 8.884     | 13735    | 1998    | 0.094   |
| 3     | 9.749     | 241532   | 30719   | 1.658   |
| 4     | 9.931     | 38304    | 6166    | 0.263   |
| 5     | 10.290    | 14199298 | 960025  | 97.473  |
| 6     | 16.137    | 13061    | 2030    | 0.090   |
| Total |           | 14567471 | 1011338 | 100.000 |

PZ054(+)\_210113090436 #1-6 RT: 0.01-0.15 AV: 6 NL: 1.54E8  
T: FTMS + p NSIFull ms [150.00-2000.00]

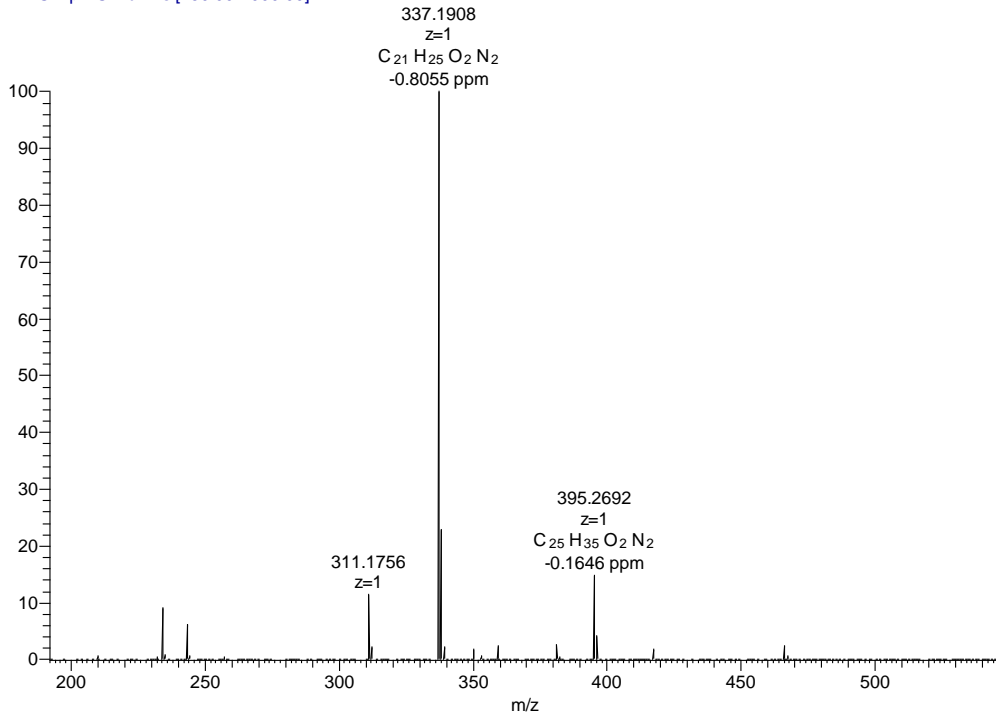

### 13a

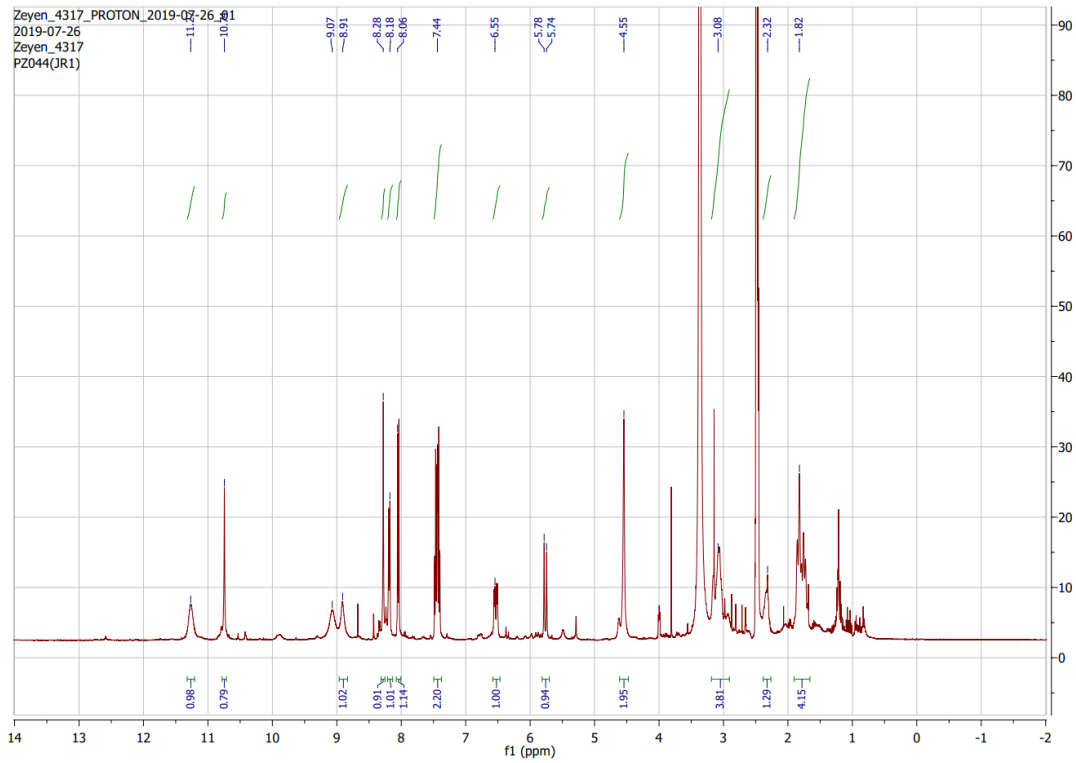

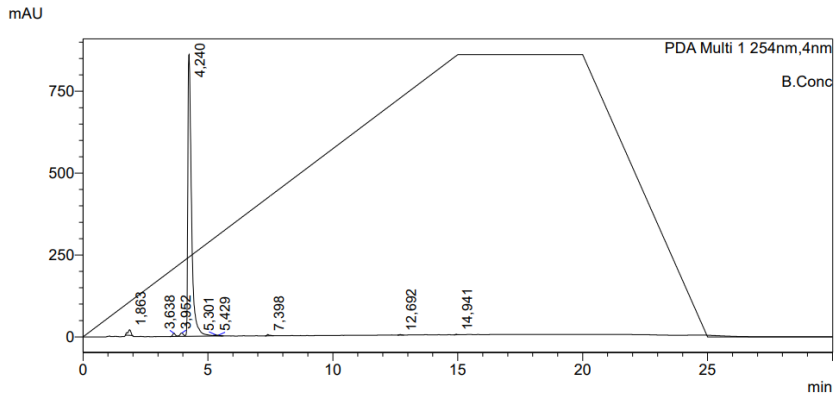

PDA Ch1 254nm

| Peak# | Ret. Time | Area    | Height | Area%   |
|-------|-----------|---------|--------|---------|
| 1     | 1,863     | 151215  | 17296  | 1,644   |
| 2     | 3,638     | 70842   | 10053  | 0,770   |
| 3     | 3,952     | 94539   | 10207  | 1,028   |
| 4     | 4,240     | 8813809 | 859997 | 95,824  |
| 5     | 5,301     | 13973   | 2841   | 0,152   |
| 6     | 5,429     | 11876   | 1968   | 0,129   |
| 7     | 7,398     | 27749   | 4004   | 0,302   |
| 8     | 12,692    | 7608    | 1484   | 0,083   |
| 9     | 14,941    | 6288    | 1577   | 0,068   |
| Total |           | 9197898 | 909425 | 100,000 |

PZ 044 #1-16 RT: 0.01-0.44 AV: 16 NL: 5.27E7  
 T: FTMS + c NSI Full ms [150.00-800.00]

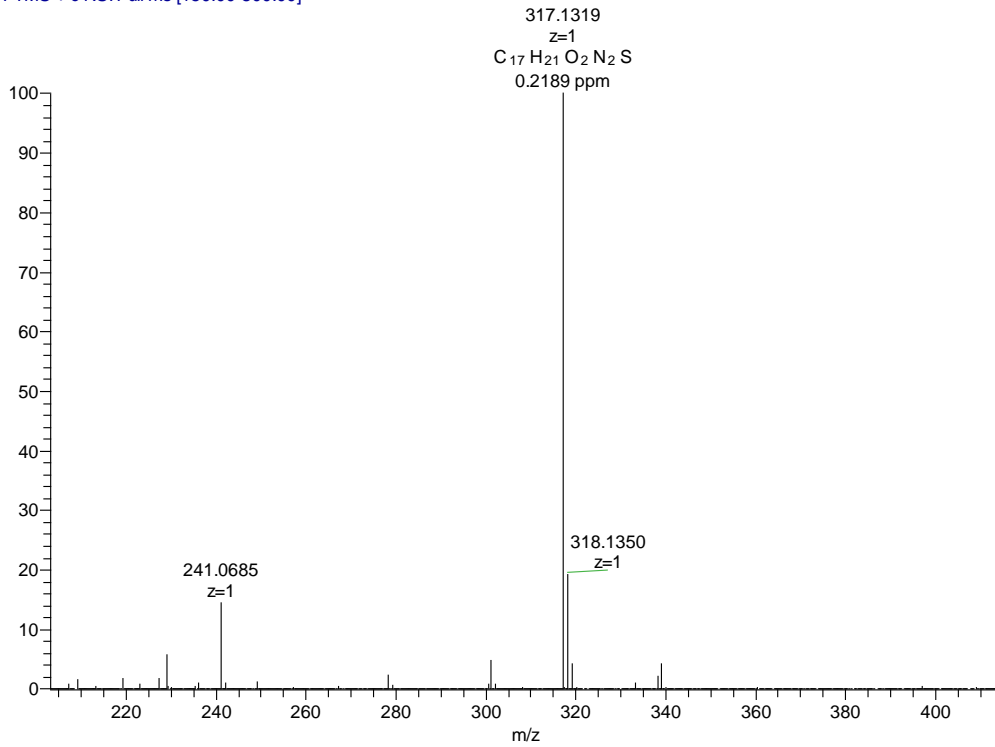

# 13b

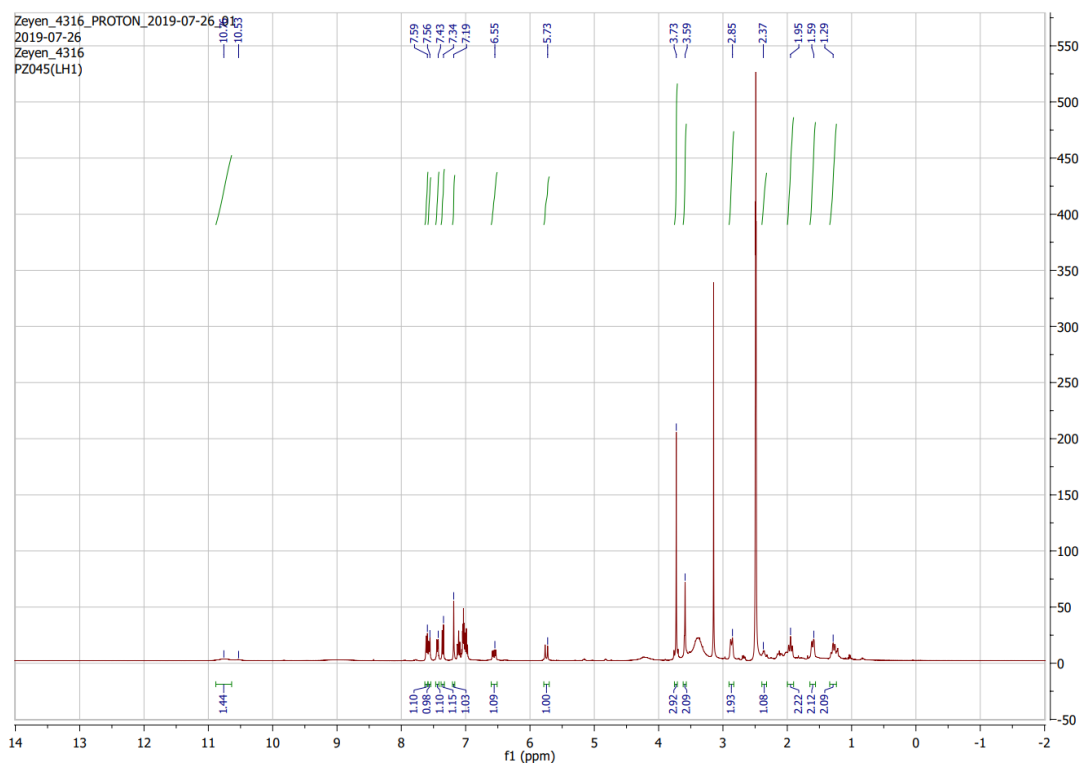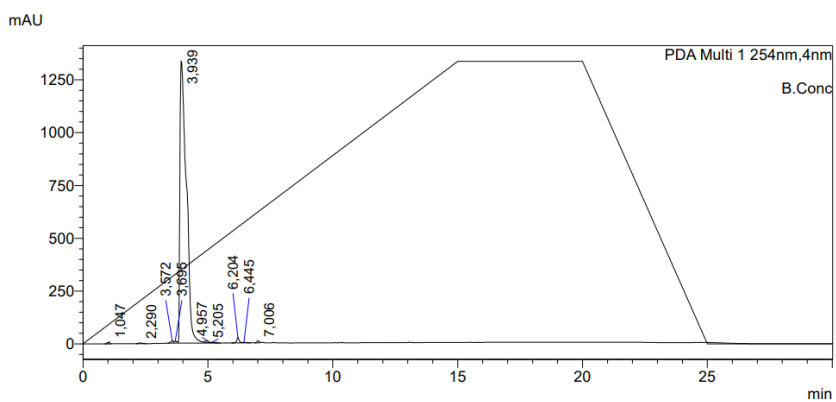

| Peak# | Ret. Time | Area     | Height  | Area%   |
|-------|-----------|----------|---------|---------|
| 1     | 1,047     | 43796    | 9514    | 0,179   |
| 2     | 2,290     | 36301    | 3240    | 0,148   |
| 3     | 3,572     | 72412    | 9646    | 0,296   |
| 4     | 3,695     | 73037    | 8499    | 0,298   |
| 5     | 3,939     | 23903548 | 1333536 | 97,643  |
| 6     | 4,957     | 56242    | 848     | 0,230   |
| 7     | 5,205     | 20033    | 3611    | 0,082   |
| 8     | 6,204     | 181677   | 24940   | 0,742   |
| 9     | 6,445     | 28417    | 2444    | 0,116   |
| 10    | 7,006     | 65067    | 10784   | 0,266   |
| Total |           | 24480530 | 1414661 | 100,000 |

PZ045 #1-16 RT: 0.01-0.43 AV: 16 NL: 2.44E7  
T: FTMS + c NSIFull ms [150.00-800.00]

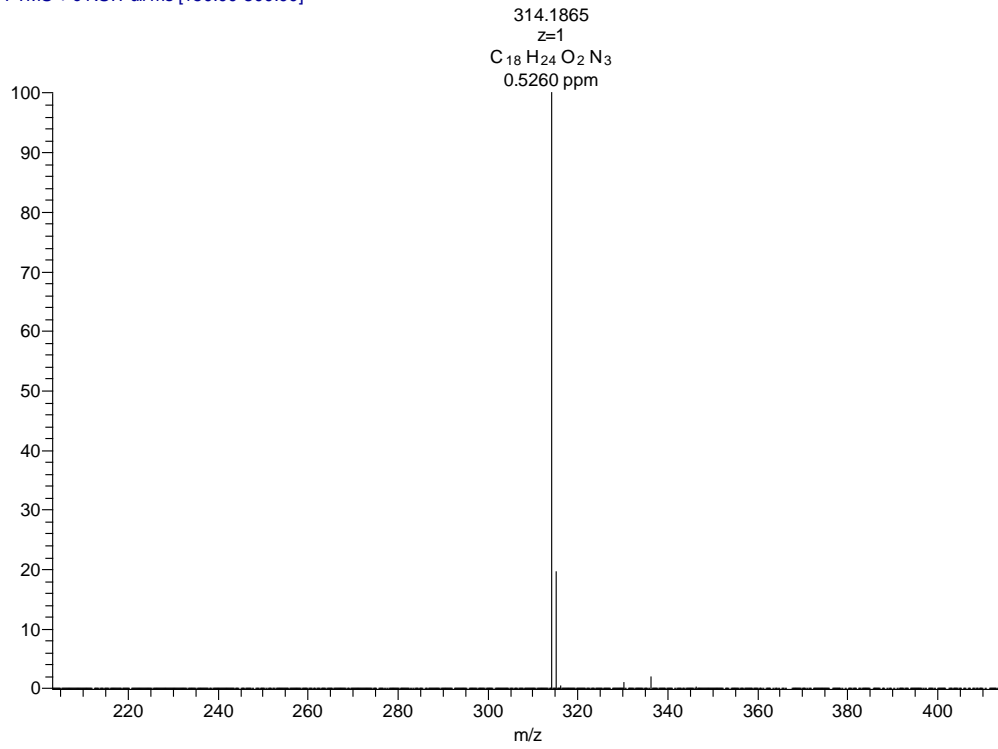

### 13c

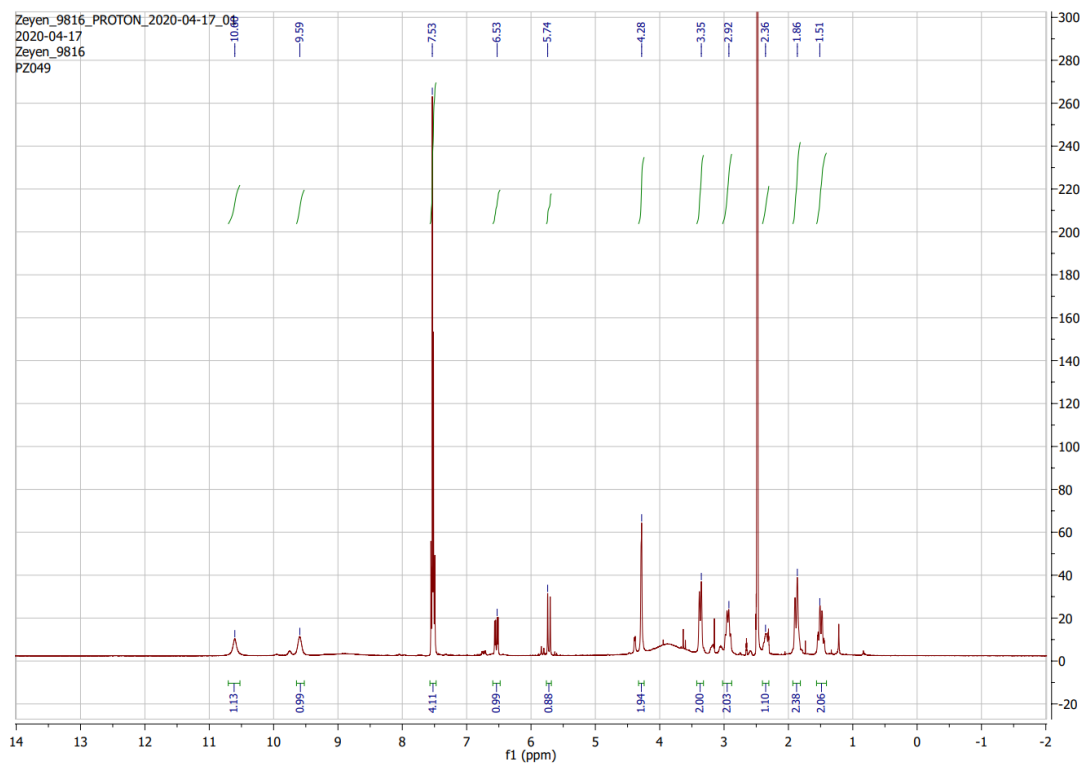



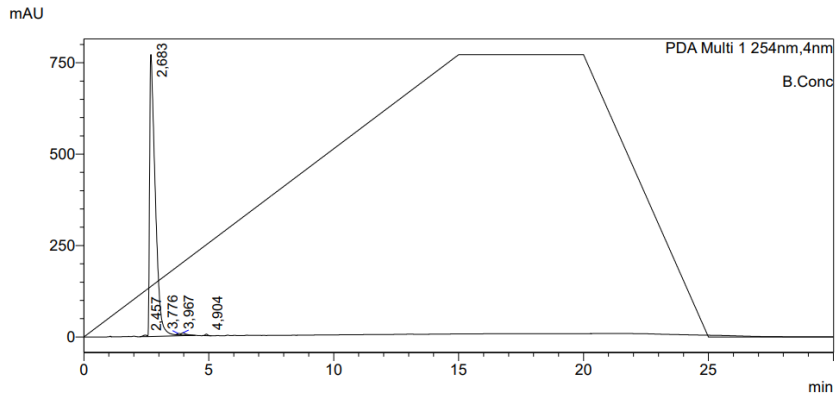

PDA Ch1 254nm

| Peak# | Ret. Time | Area     | Height | Area%   |
|-------|-----------|----------|--------|---------|
| 1     | 2.457     | 42056    | 3905   | 0.338   |
| 2     | 2.683     | 12267434 | 770734 | 98.591  |
| 3     | 3.776     | 32634    | 3541   | 0.262   |
| 4     | 3.967     | 68413    | 5525   | 0.550   |
| 5     | 4.904     | 32271    | 4322   | 0.259   |
| Total |           | 12442809 | 788027 | 100.000 |

PZ 049 #1-16 RT: 0.00-0.43 AV: 16 NL: 2.93E7  
T: FTMS + c NSI Full ms [150.00-800.00]

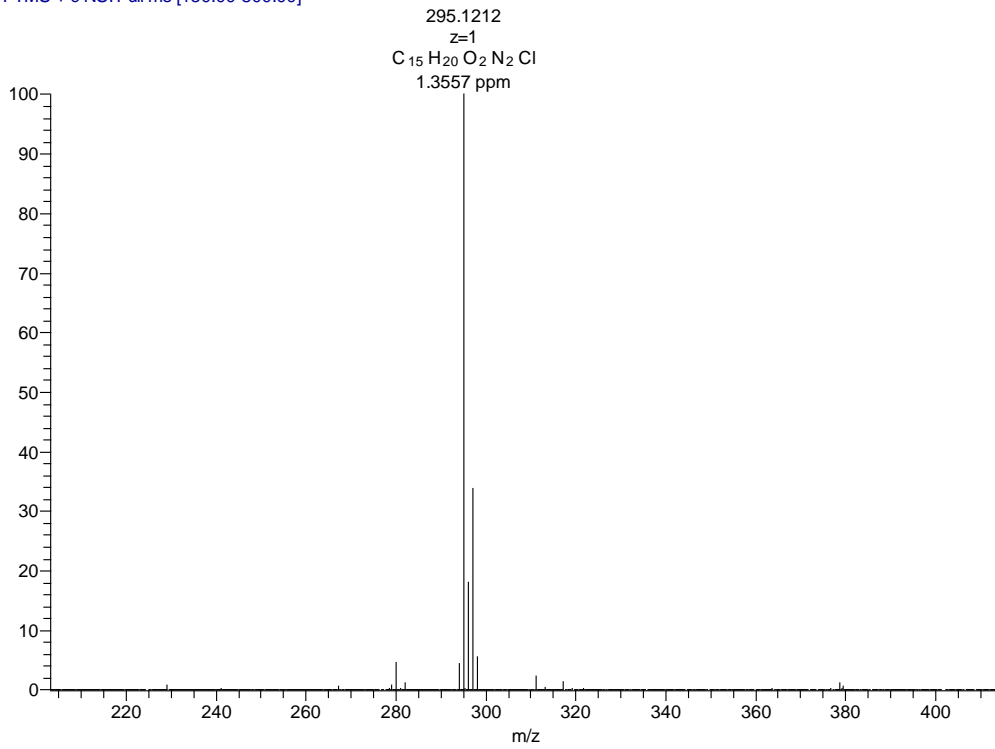

Supplement: NIHMS1788231-supplement-SI.pdf [file NIHMS1788231-supplement-SI.pdf]
